# Supplementary material for: Rapid Screening of Novel Agents for Combination Therapy in Sarcomas
Source: Hindawi journal article supplement (doi:10.1155/2013/365723), 2013-01-01

Supplemental Table 1S. Concurrent 72 hour drug combination effect summary. The sarcoma cell line and molar drug ratio for each drug combination is indicated. Combination index (CI) values for effect levels of 0.75, 0.9 and 0.95 were calculated for each independent experiment by the method of Chou and Talalay and the mean CI value “CI(mean)” was calculated using the CI for each effect level. The standard error of the mean for CI values across independent experiments are shown “CI(SEM)”. EoHSA values and level of significance are represented in EoHSA(mean) and –log p-Value columns, respectively. Each line represents the calculated mean value for the number of independent experiments (n).

| Sarcoma type | Cell line | Drug combination             | Molar ratio |       |       | CI95  | CI(mean) | CI(SEM) | n | EOHSA  |  | neg log p-Value | n |
|--------------|-----------|------------------------------|-------------|-------|-------|-------|----------|---------|---|--------|--|-----------------|---|
|              |           |                              | ratio       | CI75  | CI90  |       |          |         |   | (mean) |  |                 |   |
| Ewing        | A-673     | ABT-888 & Cisplatin          | 5           | 1.050 | 1.055 | 1.058 | 1.054    |         | 1 | -0.031 |  | 1.04            | 1 |
| Ewing        | A-673     | ABT-888 & Gemcitabine        | 250         | 1.050 | 1.028 | 1.013 | 1.030    |         | 1 | 0.111  |  | 2.41            | 1 |
| Ewing        | A-673     | ABT-888 & Triciribine        | 2.5         | 1.246 | 1.240 | 1.235 | 1.241    |         | 1 | 0.051  |  | 2.45            | 1 |
| Ewing        | A-673     | Dasatinib & Ara-C            | 1           | 0.205 | 0.203 | 0.202 | 0.203    | 0.040   | 2 | 0.170  |  | 5.06            | 2 |
| Ewing        | A-673     | Dasatinib & Gemcitabine      | 10          | 0.637 | 0.615 | 0.601 | 0.618    | 0.062   | 2 | 0.157  |  | 2.77            | 2 |
| Ewing        | A-673     | Dasatinib & Triciribine      | 0.1         | 0.418 | 0.415 | 0.413 | 0.416    |         | 1 | 0.258  |  | 4.86            | 1 |
| Ewing        | A-673     | Dasatinib & Triciribine      | 0.2         | 0.619 | 0.613 | 0.609 | 0.614    |         | 1 | 0.150  |  | 4.67            | 1 |
| Ewing        | A-673     | Dasatinib & Triciribine      | 1           | 0.176 | 0.165 | 0.157 | 0.166    |         | 1 | 0.230  |  | 4.05            | 1 |
| Ewing        | A-673     | Dasatinib & Triciribine      | 2           | 0.338 | 0.339 | 0.340 | 0.339    | 0.066   | 2 | 0.229  |  | 4.70            | 2 |
| Ewing        | A-673     | GX15-070 & Dasatinib         | 0.03        | 0.952 | 0.922 | 0.903 | 0.926    | 0.038   | 3 | 0.062  |  | 1.64            | 3 |
| Ewing        | A-673     | GX15-070 & Doxorubicin       | 20          | 0.963 | 0.942 | 0.929 | 0.945    |         | 1 | 0.049  |  | 2.86            | 1 |
| Ewing        | A-673     | GX15-070 & Etoposide         | 0.2         | 1.097 | 1.120 | 1.136 | 1.118    |         | 1 | 0.128  |  | 5.65            | 1 |
| Ewing        | A-673     | GX15-070 & PXD-101           | 1           | 0.869 | 0.890 | 0.905 | 0.888    | 0.302   | 3 | 0.019  |  | 0.71            | 3 |
| Ewing        | A-673     | GX15-070 & Vorinostat        | 0.03        | 1.142 | 1.140 | 1.139 | 1.140    |         | 1 | -0.011 |  | 0.39            | 1 |
| Ewing        | A-673     | GX15-070 & Vorinostat        | 0.06        | 1.251 | 1.240 | 1.233 | 1.241    | 0.123   | 2 | 0.032  |  | 1.58            | 2 |
| Ewing        | A-673     | PXD-101 & Doxorubicin        | 2           | 0.901 | 0.897 | 0.894 | 0.897    | 0.069   | 2 | 0.037  |  | 0.34            | 1 |
| Ewing        | A-673     | PXD-101 & Etoposide          | 0.1         | 0.821 | 0.813 | 0.807 | 0.814    | 0.133   | 2 | 0.099  |  | 1.42            | 1 |
| Ewing        | A-673     | PXD-101 & Topotecan          | 1           | 1.044 | 1.048 | 1.050 | 1.048    | 0.028   | 2 | 0.047  |  | 2.65            | 1 |
| Ewing        | A-673     | Rapamycin & Ara-C            | 10          | 0.776 | 0.877 | 0.953 | 0.868    |         | 1 | 0.063  |  | 2.01            | 1 |
| Ewing        | A-673     | Rapamycin & Sunitinib        | 10          | 0.572 | 0.600 | 0.620 | 0.598    |         | 1 | 0.049  |  | 1.00            | 1 |
| Ewing        | A-673     | Saracatinib & Ara-C          | 10          | 0.340 | 0.335 | 0.333 | 0.336    |         | 1 | 0.218  |  | 7.67            | 1 |
| Ewing        | A-673     | Saracatinib & Gemcitabine    | 100         | 0.631 | 0.600 | 0.580 | 0.604    |         | 1 | 0.106  |  | 1.78            | 1 |
| Ewing        | A-673     | Saracatinib & Triciribine    | 1           | 0.508 | 0.505 | 0.503 | 0.505    |         | 1 | 0.158  |  | 6.48            | 1 |
| Ewing        | A-673     | Selumetinib & Doxorubicin    | 0.5         | 0.988 | 1.076 | 1.140 | 1.068    |         | 1 | 0.056  |  | 0.93            | 1 |
| Ewing        | A-673     | Selumetinib & Doxorubicin    | 10          | 0.562 | 0.547 | 0.538 | 0.549    |         | 1 | 0.167  |  | 1.69            | 1 |
| Ewing        | A-673     | Selumetinib & Etoposide      | 0.15        | 0.660 | 0.634 | 0.617 | 0.637    |         | 1 | 0.129  |  | 2.91            | 1 |
| Ewing        | A-673     | Selumetinib & Etoposide      | 0.2         | 0.685 | 0.728 | 0.760 | 0.724    |         | 1 | 0.037  |  | 1.40            | 1 |
| Ewing        | A-673     | Selumetinib & Topotecan      | 2           | 1.288 | 1.354 | 1.401 | 1.348    |         | 1 | 0.007  |  | 0.08            | 1 |
| Ewing        | A-673     | Selumetinib & Topotecan      | 3           | 0.882 | 0.881 | 0.881 | 0.881    |         | 1 | 0.006  |  | 0.11            | 1 |
| Ewing        | A-673     | Sunitinib & Ara-C            | 1           | 1.669 | 1.693 | 1.710 | 1.691    |         | 1 | -0.017 |  | 0.63            | 1 |
| Ewing        | RD-ES     | 4-HC & Doxorubicin           | 50          | 1.752 | 1.733 | 1.720 | 1.735    |         | 1 | -0.002 |  | 0.10            | 1 |
| Ewing        | RD-ES     | Dasatinib & Ara-C            | 1           | 0.742 | 0.721 | 0.707 | 0.723    | 0.012   | 2 | 0.148  |  | 4.47            | 2 |
| Ewing        | RD-ES     | Dasatinib & Gemcitabine      | 10          | 0.598 | 0.579 | 0.566 | 0.581    |         | 1 | 0.165  |  | 3.09            | 1 |
| Ewing        | RD-ES     | Dasatinib & MK-2206          | 0.2         | 1.148 | 1.326 | 1.478 | 1.317    | 0.295   | 2 | 0.018  |  | 0.76            | 2 |
| Ewing        | RD-ES     | Dasatinib & MK-2206          | 1           | 0.177 | 0.178 | 0.183 | 0.180    | 0.034   | 2 | 0.226  |  | 4.40            | 2 |
| Ewing        | RD-ES     | Dasatinib & MK-2206          | 5           | 0.183 | 0.111 | 0.080 | 0.125    |         | 1 | 0.151  |  | 5.56            | 1 |
| Ewing        | RD-ES     | Dasatinib & Triciribine      | 0.125       | 0.320 | 0.329 | 0.335 | 0.328    |         | 1 | 0.238  |  | 3.14            | 1 |
| Ewing        | RD-ES     | Dasatinib & Triciribine      | 0.25        | 0.572 | 0.570 | 0.569 | 0.570    | 0.076   | 2 | 0.136  |  | 3.60            | 2 |
| Ewing        | RD-ES     | Dasatinib & Triciribine      | 1           | 0.233 | 0.214 | 0.207 | 0.218    | 0.090   | 3 | 0.227  |  | 3.94            | 3 |
| Ewing        | RD-ES     | Dasatinib & Triciribine      | 2           | 0.192 | 0.175 | 0.169 | 0.179    | 0.075   | 3 | 0.278  |  | 4.71            | 3 |
| Ewing        | RD-ES     | GX15-070 & Dasatinib         | 0.03        | 0.681 | 0.618 | 0.578 | 0.626    | 0.127   | 2 | 0.091  |  | 2.49            | 2 |
| Ewing        | RD-ES     | GX15-070 & Doxorubicin       | 2           | 1.117 | 1.106 | 1.099 | 1.107    |         | 1 | 0.019  |  | 1.78            | 1 |
| Ewing        | RD-ES     | GX15-070 & Doxorubicin       | 20          | 1.267 | 1.269 | 1.270 | 1.268    |         | 1 | 0.073  |  | 1.31            | 1 |
| Ewing        | RD-ES     | GX15-070 & Etoposide         | 0.2         | 0.656 | 0.711 | 0.752 | 0.706    |         | 1 | 0.096  |  | 1.26            | 1 |
| Ewing        | RD-ES     | GX15-070 & PXD-101           | 1           | 1.207 | 1.137 | 1.093 | 1.146    | 0.028   | 3 | -0.011 |  | 0.11            | 3 |
| Ewing        | RD-ES     | MK-2206 & 4-HC               | 1           | 0.547 | 0.562 | 0.573 | 0.561    |         | 1 | 0.077  |  | 1.55            | 1 |
| Ewing        | RD-ES     | MK-2206 & 4-HC & Doxorubicin | 1           | 0.695 | 0.709 | 0.718 | 0.707    |         | 1 | 0.075  |  | 1.28            | 1 |
| Ewing        | RD-ES     | MK-2206 & Cisplatin          | 0.5         | 0.948 | 1.143 | 1.349 | 1.122    | 0.254   | 4 | 0.081  |  | 1.36            | 4 |
| Ewing        | RD-ES     | MK-2206 & Doxorubicin        | 100         | 0.534 | 0.471 | 0.439 | 0.481    |         | 1 | 0.204  |  | 3.20            | 1 |
| Ewing        | RD-ES     | MK-2206 & Doxorubicin        | 20          | 0.443 | 0.408 | 0.392 | 0.414    | 0.084   | 5 | 0.195  |  | 4.47            | 5 |
| Ewing        | RD-ES     | MK-2206 & Doxorubicin        | 50          | 0.502 | 0.489 | 0.480 | 0.490    | 0.111   | 2 | 0.166  |  | 2.18            | 2 |
| Ewing        | RD-ES     | MK-2206 & Etoposide          | 1           | 0.213 | 0.239 | 0.260 | 0.237    | 0.079   | 5 | 0.144  |  | 3.42            | 5 |
| Ewing        | RD-ES     | MK-2206 & Etoposide          | 5           | 0.449 | 0.448 | 0.475 | 0.457    | 0.087   | 5 | 0.130  |  | 1.49            | 5 |
| Ewing        | RD-ES     | MK-2206 & MK-8669            | 0.2         | 0.589 | 0.549 | 0.542 | 0.560    | 0.126   | 9 | 0.208  |  | 4.04            | 8 |
| Ewing        | RD-ES     | MK-2206 & MK-8669            | 2           | 0.072 | 0.177 | 0.370 | 0.206    | 0.102   | 3 | 0.257  |  | 3.89            | 2 |
| Ewing        | RD-ES     | MK-2206 & Topotecan          | 50          | 0.606 | 0.616 | 0.627 | 0.616    | 0.021   | 4 | 0.045  |  | 0.85            | 4 |

| Sarcoma type | Cell line | Drug combination             | Molar  |       |        |         |          |         |    | EOHSA  |       |   |  | neg log p- |  |
|--------------|-----------|------------------------------|--------|-------|--------|---------|----------|---------|----|--------|-------|---|--|------------|--|
|              |           |                              | ratio  | CI75  | CI90   | CI95    | CI(mean) | CI(SEM) | n  | (mean) | Value | n |  |            |  |
| Ewing        | RD-ES     | MK-2206 & Topotecan          | 5000   | 0.383 | 0.308  | 0.359   | 0.350    |         | 1  | 0.017  | 0.39  | 1 |  |            |  |
| Ewing        | RD-ES     | PXD-101 & Doxorubicin        | 2      | 0.980 | 0.994  | 1.004   | 0.992    | 0.063   | 2  | 0.092  | 1.87  | 2 |  |            |  |
| Ewing        | RD-ES     | PXD-101 & Etoposide          | 0.1    | 1.073 | 1.080  | 1.085   | 1.079    | 0.237   | 2  | 0.056  | 1.82  | 2 |  |            |  |
| Ewing        | RD-ES     | Saracatinib & Ara-C          | 10     | 1.030 | 1.007  | 0.993   | 1.010    |         | 1  | 0.111  | 2.94  | 1 |  |            |  |
| Ewing        | RD-ES     | Saracatinib & Gemcitabine    | 100    | 1.320 | 1.283  | 1.259   | 1.287    |         | 1  | -0.026 | 0.68  | 1 |  |            |  |
| Ewing        | RD-ES     | Saracatinib & Triciribine    | 1      | 0.466 | 0.438  | 0.420   | 0.441    |         | 1  | 0.342  | 5.39  | 1 |  |            |  |
| Ewing        | RD-ES     | Selumetinib & Doxorubicin    | 0.5    | 0.657 | 0.649  | 0.643   | 0.649    |         | 1  | 0.051  | 0.97  | 1 |  |            |  |
| Ewing        | RD-ES     | Selumetinib & Doxorubicin    | 10     | 2.880 | 2.728  | 2.632   | 2.745    |         | 1  | -0.071 | 0.76  | 1 |  |            |  |
| Ewing        | RD-ES     | Selumetinib & Etoposide      | 0.2    | 0.486 | 0.471  | 0.462   | 0.473    |         | 1  | 0.093  | 1.93  | 1 |  |            |  |
| Ewing        | RD-ES     | Selumetinib & Topotecan      | 2      | 1.399 | 1.384  | 1.374   | 1.386    |         | 1  | -0.038 | 0.64  | 1 |  |            |  |
| Ewing        | RD-ES     | Selumetinib & Topotecan      | 3      | 1.099 | 1.079  | 1.066   | 1.082    |         | 1  | 0.032  | 0.58  | 1 |  |            |  |
| Ewing        | RD-ES     | Sorafenib & Topotecan        | 500    | 1.004 | 1.097  | 1.187   | 1.096    | 0.071   | 2  | 0.046  | 1.12  | 1 |  |            |  |
| Ewing        | RD-ES     | Sunitinib & Ara-C            | 1      | 0.688 | 0.679  | 0.673   | 0.680    |         | 1  | 0.107  | 2.62  | 1 |  |            |  |
| Ewing        | RD-ES     | Triciribine & Dasatinib      | 0.5    | 0.130 | 0.098  | 0.088   | 0.106    | 0.059   | 3  | 0.261  | 4.47  | 3 |  |            |  |
| Ewing        | RD-ES     | Triciribine & Dasatinib      | 5      | 0.104 | 0.035  | 0.017   | 0.052    |         | 1  | 0.268  | 8.27  | 1 |  |            |  |
| Ewing        | RD-ES     | Triciribine & Doxorubicin    | 800    | 1.288 | 1.285  | 1.284   | 1.285    |         | 1  | 0.034  | 1.28  | 1 |  |            |  |
| Ewing        | RD-ES     | Triciribine & Etoposide      | 40     | 2.048 | 2.014  | 1.992   | 2.018    |         | 1  | -0.054 | 1.38  | 1 |  |            |  |
| Ewing        | RD-ES     | Triciribine & Rapamycin      | 0.2    | 0.746 | 0.550  | 0.452   | 0.583    |         | 1  | 0.051  | 1.50  | 1 |  |            |  |
| Ewing        | RD-ES     | Triciribine & Rapamycin      | 1      | 2.618 | 31.708 | 173.240 | 24.319   |         | 1  | 0.063  | 3.80  | 1 |  |            |  |
| Ewing        | RD-ES     | Triciribine & Rapamycin      | 5      | 0.900 | 0.826  | 0.782   | 0.836    |         | 1  | 0.005  | 0.36  | 1 |  |            |  |
| Ewing        | SK-ES-1   | 4-HC & Doxorubicin           | 50     | 1.103 | 1.089  | 1.079   | 1.090    | 0.027   | 2  | 0.015  | 0.81  | 2 |  |            |  |
| Ewing        | SK-ES-1   | ABT-888 & Cisplatin          | 5      | 0.908 | 0.919  | 0.927   | 0.918    |         | 1  | 0.021  | 0.54  | 1 |  |            |  |
| Ewing        | SK-ES-1   | ABT-888 & Gemcitabine        | 250    | 1.099 | 1.153  | 1.191   | 1.147    |         | 1  | 0.062  | 1.26  | 1 |  |            |  |
| Ewing        | SK-ES-1   | ABT-888 & Triciribine        | 2.5    | 0.666 | 0.658  | 0.653   | 0.659    |         | 1  | 0.138  | 2.67  | 1 |  |            |  |
| Ewing        | SK-ES-1   | Dasatinib & Ara-C            | 1      | 0.337 | 0.316  | 0.303   | 0.319    |         | 1  | 0.262  | 5.75  | 1 |  |            |  |
| Ewing        | SK-ES-1   | Dasatinib & Ara-C            | 5      | 0.622 | 0.621  | 0.620   | 0.621    |         | 1  | 0.046  | 0.40  | 1 |  |            |  |
| Ewing        | SK-ES-1   | Dasatinib & Doxorubicin      | 1      | 0.756 | 0.758  | 0.759   | 0.758    |         | 1  | 0.016  | 0.76  | 1 |  |            |  |
| Ewing        | SK-ES-1   | Dasatinib & Doxorubicin      | 5      | 0.711 | 0.710  | 0.709   | 0.710    |         | 1  | 0.023  | 0.51  | 1 |  |            |  |
| Ewing        | SK-ES-1   | Dasatinib & Etoposide        | 0.2    | 1.504 | 1.718  | 1.891   | 1.704    |         | 1  |        |       |   |  |            |  |
| Ewing        | SK-ES-1   | Dasatinib & Etoposide        | 1      | 0.998 | 1.197  | 1.366   | 1.178    | 0.127   | 5  | 0.035  | 0.56  | 2 |  |            |  |
| Ewing        | SK-ES-1   | Dasatinib & Gemcitabine      | 10     | 0.626 | 0.638  | 0.646   | 0.637    | 0.077   | 3  | 0.080  | 1.10  | 3 |  |            |  |
| Ewing        | SK-ES-1   | Dasatinib & MK-2206          | 0.1    | 0.539 | 0.541  | 0.551   | 0.543    |         | 1  | 0.124  | 2.08  | 1 |  |            |  |
| Ewing        | SK-ES-1   | Dasatinib & MK-2206          | 0.2    | 0.887 | 0.827  | 0.826   | 0.846    | 0.327   | 3  | 0.075  | 1.46  | 3 |  |            |  |
| Ewing        | SK-ES-1   | Dasatinib & MK-2206          | 1      | 0.167 | 0.167  | 0.168   | 0.167    | 0.070   | 3  | 0.215  | 4.34  | 3 |  |            |  |
| Ewing        | SK-ES-1   | Dasatinib & MK-2206          | 5      | 0.308 | 0.381  | 0.459   | 0.383    |         | 1  | 0.205  | 6.90  | 1 |  |            |  |
| Ewing        | SK-ES-1   | Dasatinib & Topotecan        | 10     | 0.635 | 0.667  | 0.690   | 0.664    |         | 1  | 0.047  | 0.94  | 1 |  |            |  |
| Ewing        | SK-ES-1   | Dasatinib & Topotecan        | 100    | 1.004 | 1.362  | 1.684   | 1.350    | 0.034   | 2  |        |       |   |  |            |  |
| Ewing        | SK-ES-1   | Dasatinib & Topotecan        | 13.333 | 0.473 | 0.525  | 0.572   | 0.523    |         | 1  |        |       |   |  |            |  |
| Ewing        | SK-ES-1   | Dasatinib & Topotecan        | 500    | 1.201 | 1.676  | 2.141   | 1.627    | 0.072   | 2  |        |       |   |  |            |  |
| Ewing        | SK-ES-1   | Dasatinib & Triciribine      | 0.1    | 0.300 | 0.302  | 0.304   | 0.302    | 0.066   | 2  | 0.287  | 5.30  | 2 |  |            |  |
| Ewing        | SK-ES-1   | Dasatinib & Triciribine      | 0.2    | 0.412 | 0.406  | 0.401   | 0.406    |         | 1  | 0.254  | 5.43  | 1 |  |            |  |
| Ewing        | SK-ES-1   | Dasatinib & Triciribine      | 0.5    | 0.283 | 0.276  | 0.272   | 0.277    | 0.037   | 2  | 0.198  | 4.87  | 2 |  |            |  |
| Ewing        | SK-ES-1   | Dasatinib & Triciribine      | 1      | 0.673 | 0.661  | 0.653   | 0.662    | 0.546   | 2  | 0.076  | 3.25  | 2 |  |            |  |
| Ewing        | SK-ES-1   | Dasatinib & Triciribine      | 2      | 0.387 | 0.385  | 0.384   | 0.386    | 0.007   | 2  | 0.182  | 8.85  | 2 |  |            |  |
| Ewing        | SK-ES-1   | GX15-070 & Dasatinib         | 0.03   | 0.935 | 0.908  | 0.891   | 0.911    | 0.012   | 2  | 0.073  | 1.48  | 2 |  |            |  |
| Ewing        | SK-ES-1   | GX15-070 & PXD-101           | 1      | 1.305 | 1.402  | 1.476   | 1.395    | 0.311   | 2  | 0.028  | 0.65  | 2 |  |            |  |
| Ewing        | SK-ES-1   | GX15-070 & Vorinostat        | 0.06   | 1.295 | 1.275  | 1.262   | 1.277    | 0.031   | 2  | 0.026  | 1.16  | 2 |  |            |  |
| Ewing        | SK-ES-1   | MK-2206 & 4-HC               | 1      | 0.767 | 0.769  | 0.773   | 0.770    | 0.165   | 3  | 0.099  | 2.82  | 3 |  |            |  |
| Ewing        | SK-ES-1   | MK-2206 & 4-HC & Doxorubicin | 1      | 0.687 | 0.664  | 0.651   | 0.667    | 0.112   | 2  | 0.104  | 2.78  | 2 |  |            |  |
| Ewing        | SK-ES-1   | MK-2206 & Cisplatin          | 0.5    | 1.006 | 1.028  | 1.056   | 1.030    | 0.088   | 3  | 0.075  | 2.50  | 3 |  |            |  |
| Ewing        | SK-ES-1   | MK-2206 & Cisplatin          | 0.6667 | 1.206 | 1.244  | 1.285   | 1.245    | 0.024   | 4  | 0.066  | 3.58  | 4 |  |            |  |
| Ewing        | SK-ES-1   | MK-2206 & Dasatinib          | 1      | 0.359 | 0.448  | 0.521   | 0.443    |         | 1  | 0.096  | 3.83  | 1 |  |            |  |
| Ewing        | SK-ES-1   | MK-2206 & Doxorubicin        | 100    | 0.722 | 0.718  | 0.715   | 0.718    |         | 1  | 0.166  | 2.13  | 1 |  |            |  |
| Ewing        | SK-ES-1   | MK-2206 & Doxorubicin        | 50     | 0.657 | 0.634  | 0.621   | 0.637    | 0.077   | 6  | 0.150  | 3.30  | 6 |  |            |  |
| Ewing        | SK-ES-1   | MK-2206 & Etoposide          | 5      | 0.450 | 0.406  | 0.387   | 0.414    | 0.141   | 3  | 0.176  | 2.58  | 3 |  |            |  |
| Ewing        | SK-ES-1   | MK-2206 & Etoposide          | 6.6667 | 0.258 | 0.197  | 0.173   | 0.209    |         | 1  | 0.306  | 4.57  | 1 |  |            |  |
| Ewing        | SK-ES-1   | MK-2206 & MK-8669            | 0.2    | 0.755 | 0.931  | 1.293   | 0.943    | 0.131   | 10 | 0.160  | 4.50  | 7 |  |            |  |
| Ewing        | SK-ES-1   | MK-2206 & MK-8669            | 2      | 0.855 | 0.924  | 0.997   | 0.925    | 0.774   | 2  | 0.184  | 7.22  | 2 |  |            |  |
| Ewing        | SK-ES-1   | MK-2206 & Topotecan          | 50     | 0.514 | 0.544  | 0.580   | 0.546    | 0.058   | 3  | 0.120  | 2.17  | 3 |  |            |  |
| Ewing        | SK-ES-1   | MK-2206 & Topotecan          | 500    | 0.309 | 0.275  | 0.280   | 0.288    |         | 1  | 0.134  | 3.48  | 1 |  |            |  |
| Ewing        | SK-ES-1   | MK-2206 & Topotecan          | 66.667 | 0.831 | 1.210  | 1.653   | 1.181    | 0.297   | 3  | 0.078  | 1.58  | 3 |  |            |  |
| Ewing        | SK-ES-1   | MK-8669 & MK-2206            | 0.2    | 0.814 | 0.765  | 0.734   | 0.771    |         | 1  | 0.123  | 1.39  | 1 |  |            |  |

| Sarcoma type | Cell line | Drug combination             | Molar ratio | EOHSA |       |       |          |         | n  | neg log p-Value | n    |   |
|--------------|-----------|------------------------------|-------------|-------|-------|-------|----------|---------|----|-----------------|------|---|
|              |           |                              |             | CI75  | CI90  | CI95  | CI(mean) | CI(SEM) |    |                 |      |   |
| Ewing        | SK-ES-1   | MK-8669 & MK-2206            | 5           | 0.744 | 0.823 | 0.923 | 0.830    | 0.283   | 3  |                 |      |   |
| Ewing        | SK-ES-1   | PXD-101 & Doxorubicin        | 2           | 0.925 | 0.924 | 0.924 | 0.924    | 0.152   | 2  | 0.166           | 3.67 | 1 |
| Ewing        | SK-ES-1   | PXD-101 & Etoposide          | 0.1         | 0.879 | 0.879 | 0.879 | 0.879    | 0.047   | 2  | 0.108           | 3.61 | 1 |
| Ewing        | SK-ES-1   | Saracatinib & Gemcitabine    | 100         | 0.914 | 0.937 | 0.953 | 0.935    |         | 1  | 0.084           | 1.19 | 1 |
| Ewing        | SK-ES-1   | Saracatinib & Triciribine    | 1           | 0.370 | 0.352 | 0.340 | 0.354    |         | 1  | 0.233           | 4.15 | 1 |
| Ewing        | SK-ES-1   | Selumetinib & Doxorubicin    | 0.5         | 0.933 | 0.979 | 1.012 | 0.975    |         | 1  | 0.047           | 0.94 | 1 |
| Ewing        | SK-ES-1   | Selumetinib & Doxorubicin    | 10          | 0.837 | 0.745 | 0.690 | 0.758    |         | 1  | 0.162           | 1.26 | 1 |
| Ewing        | SK-ES-1   | Selumetinib & Etoposide      | 0.15        | 0.991 | 1.027 | 1.052 | 1.024    |         | 1  | 0.010           | 0.46 | 1 |
| Ewing        | SK-ES-1   | Selumetinib & Etoposide      | 0.2         | 1.071 | 1.100 | 1.130 | 1.100    |         | 1  | 0.011           | 0.47 | 1 |
| Ewing        | SK-ES-1   | Selumetinib & Topotecan      | 2           | 0.504 | 0.550 | 0.586 | 0.547    |         | 1  | 0.019           | 0.47 | 1 |
| Ewing        | SK-ES-1   | Selumetinib & Topotecan      | 3           | 0.877 | 0.808 | 0.764 | 0.816    |         | 1  | 0.014           | 0.21 | 1 |
| Ewing        | SK-ES-1   | Sorafenib & Topotecan        | 50          | 2.522 | 3.165 | 3.731 | 3.087    | 2.180   | 4  | -0.111          | 0.96 | 3 |
| Ewing        | SK-ES-1   | Sorafenib & Topotecan        | 500         | 1.581 | 1.669 | 1.748 | 1.661    | 0.354   | 3  | 0.076           | 2.24 | 2 |
| Ewing        | SK-ES-1   | Sunitinib & Ara-C            | 1           | 1.279 | 1.301 | 1.316 | 1.299    |         | 1  | -0.045          | 3.06 | 1 |
| Ewing        | SK-ES-1   | Vorinostat & Cisplatin       | 0.2         | 0.986 | 0.953 | 0.971 | 0.970    | 0.247   | 4  | 0.045           | 1.19 | 3 |
| Ewing        | SK-ES-1   | Vorinostat & Etoposide       | 2           | 1.100 | 0.989 | 0.931 | 1.007    | 0.096   | 3  | 0.095           | 1.67 | 2 |
| Ewing        | SK-ES-1   | Vorinostat & MK-8669         | 0.05        | 1.317 | 1.464 | 1.586 | 1.455    |         | 1  |                 |      |   |
| Ewing        | SK-ES-1   | Vorinostat & Topotecan       | 8           | 0.783 | 0.729 | 0.789 | 0.767    | 0.127   | 2  | 0.017           | 1.42 | 1 |
| osteosarcoma | MNNG HOS  | 4-HC & Doxorubicin           | 50          | 1.500 | 1.395 | 1.328 | 1.408    |         | 1  | 0.046           | 1.35 | 1 |
| osteosarcoma | MNNG HOS  | Dasatinib & Ara-C            | 5           | 0.184 | 0.169 | 0.160 | 0.171    | 0.007   | 2  | 0.287           | 4.66 | 2 |
| osteosarcoma | MNNG HOS  | Dasatinib & Doxorubicin      | 1           | 0.188 | 0.185 | 0.183 | 0.185    |         | 1  | 0.272           | 5.05 | 1 |
| osteosarcoma | MNNG HOS  | Dasatinib & Doxorubicin      | 5           | 0.196 | 0.225 | 0.247 | 0.223    |         | 1  | 0.162           | 4.90 | 1 |
| osteosarcoma | MNNG HOS  | Dasatinib & Etoposide        | 1           | 0.178 | 0.168 | 0.165 | 0.170    | 0.070   | 5  | 0.084           | 2.95 | 2 |
| osteosarcoma | MNNG HOS  | Dasatinib & Gemcitabine      | 10          | 0.063 | 0.058 | 0.054 | 0.058    | 0.020   | 2  | 0.251           | 5.35 | 2 |
| osteosarcoma | MNNG HOS  | Dasatinib & MK-2206          | 0.1         | 0.356 | 0.438 | 0.529 | 0.441    |         | 1  | 0.163           | 2.64 | 1 |
| osteosarcoma | MNNG HOS  | Dasatinib & MK-2206          | 0.2         | 1.153 | 1.737 | 2.395 | 1.686    |         | 1  | 0.068           | 1.24 | 1 |
| osteosarcoma | MNNG HOS  | Dasatinib & MK-2206          | 0.5         | 0.342 | 0.552 | 0.849 | 0.581    |         | 1  | 0.203           | 5.66 | 1 |
| osteosarcoma | MNNG HOS  | Dasatinib & MK-2206          | 1           | 0.022 | 0.006 | 0.003 | 0.011    |         | 1  | 0.173           | 4.10 | 1 |
| osteosarcoma | MNNG HOS  | Dasatinib & Topotecan        | 10          | 0.141 | 0.147 | 0.151 | 0.146    | 0.012   | 2  | 0.171           | 4.88 | 2 |
| osteosarcoma | MNNG HOS  | Dasatinib & Topotecan        | 100         | 0.208 | 0.210 | 0.223 | 0.214    | 0.169   | 3  |                 |      |   |
| osteosarcoma | MNNG HOS  | Dasatinib & Topotecan        | 20          | 0.934 | 0.996 | 1.041 | 0.990    |         | 1  |                 |      |   |
| osteosarcoma | MNNG HOS  | Dasatinib & Topotecan        | 500         | 0.499 | 0.245 | 0.151 | 0.298    |         | 1  |                 |      |   |
| osteosarcoma | MNNG HOS  | Dasatinib & Triciribine      | 0.1         | 0.715 | 0.699 | 0.689 | 0.701    |         | 1  | 0.023           | 0.60 | 1 |
| osteosarcoma | MNNG HOS  | Dasatinib & Triciribine      | 0.2         | 0.993 | 0.956 | 0.932 | 0.960    |         | 1  | -0.019          | 0.37 | 1 |
| osteosarcoma | MNNG HOS  | GX15-070 & Dasatinib         | 0.03        | 0.873 | 0.873 | 0.872 | 0.873    | 0.099   | 2  | 0.114           | 2.98 | 2 |
| osteosarcoma | MNNG HOS  | GX15-070 & Doxorubicin       | 2           | 1.444 | 1.437 | 1.433 | 1.438    |         | 1  | 0.047           | 1.72 | 1 |
| osteosarcoma | MNNG HOS  | GX15-070 & PXD-101           | 1           | 1.470 | 1.512 | 1.541 | 1.507    |         | 1  | -0.058          | 0.68 | 1 |
| osteosarcoma | MNNG HOS  | GX15-070 & Topotecan         | 1           | 1.333 | 1.347 | 1.356 | 1.345    |         | 1  | 0.072           | 2.67 | 1 |
| osteosarcoma | MNNG HOS  | GX15-070 & Vorinostat        | 0.03        | 1.540 | 1.521 | 1.508 | 1.523    |         | 1  | -0.015          | 0.12 | 1 |
| osteosarcoma | MNNG HOS  | GX15-070 & Vorinostat        | 0.06        | 1.603 | 1.624 | 1.640 | 1.622    | 0.181   | 2  | -0.075          | 0.77 | 2 |
| osteosarcoma | MNNG HOS  | MK-2206 & 4-HC               | 1           | 1.085 | 1.082 | 1.080 | 1.082    |         | 1  | 0.062           | 0.80 | 1 |
| osteosarcoma | MNNG HOS  | MK-2206 & 4-HC & Doxorubicin | 1           | 0.690 | 0.681 | 0.676 | 0.682    | 0.223   | 2  | 0.115           | 2.54 | 2 |
| osteosarcoma | MNNG HOS  | MK-2206 & Cisplatin          | 0.5         | 2.603 | 3.931 | 5.289 | 3.779    | 0.440   | 2  | 0.026           | 1.22 | 2 |
| osteosarcoma | MNNG HOS  | MK-2206 & Dasatinib          | 1           | 0.210 | 0.229 | 0.273 | 0.237    |         | 1  | 0.204           | 4.02 | 1 |
| osteosarcoma | MNNG HOS  | MK-2206 & Doxorubicin        | 100         | 0.643 | 0.665 | 0.681 | 0.663    |         | 1  | 0.195           | 3.69 | 1 |
| osteosarcoma | MNNG HOS  | MK-2206 & Doxorubicin        | 5           | 0.665 | 0.653 | 0.646 | 0.655    | 0.058   | 3  | 0.166           | 4.29 | 3 |
| osteosarcoma | MNNG HOS  | MK-2206 & Doxorubicin        | 50          | 0.613 | 0.576 | 0.553 | 0.581    | 0.128   | 5  | 0.149           | 2.22 | 5 |
| osteosarcoma | MNNG HOS  | MK-2206 & Etoposide          | 5           | 0.490 | 0.432 | 0.401 | 0.441    | 0.097   | 3  | 0.165           | 1.94 | 3 |
| osteosarcoma | MNNG HOS  | MK-2206 & MK-8669            | 0.2         | 1.693 | 3.692 | 8.080 | 3.344    | 1.920   | 11 | 0.240           | 4.30 | 8 |
| osteosarcoma | MNNG HOS  | MK-2206 & Topotecan          | 50          | 1.603 | 3.279 | 5.686 | 3.068    | 2.892   | 2  | 0.036           | 0.91 | 2 |
| osteosarcoma | MNNG HOS  | MK-8669 & MK-2206            | 5           | 1.177 | 1.259 | 1.331 | 1.256    | 0.083   | 3  |                 |      |   |
| osteosarcoma | MNNG HOS  | PXD-101 & Doxorubicin        | 2           | 1.508 | 1.488 | 1.476 | 1.491    |         | 1  |                 |      |   |
| osteosarcoma | MNNG HOS  | PXD-101 & Etoposide          | 0.1         | 1.034 | 1.039 | 1.043 | 1.039    |         | 1  |                 |      |   |
| osteosarcoma | MNNG HOS  | PXD-101 & Topotecan          | 1           | 0.953 | 0.934 | 0.922 | 0.936    |         | 1  |                 |      |   |
| osteosarcoma | MNNG HOS  | Saracatinib & Ara-C          | 10          | 0.557 | 0.564 | 0.569 | 0.563    |         | 1  | 0.153           | 3.41 | 1 |
| osteosarcoma | MNNG HOS  | Saracatinib & Gemcitabine    | 100         | 0.572 | 0.558 | 0.549 | 0.560    |         | 1  | 0.203           | 2.98 | 1 |
| osteosarcoma | MNNG HOS  | Selumetinib & Doxorubicin    | 0.5         | 0.912 | 0.909 | 0.906 | 0.909    |         | 1  | -0.096          | 0.52 | 1 |
| osteosarcoma | MNNG HOS  | Selumetinib & Doxorubicin    | 10          | 0.425 | 0.350 | 0.307 | 0.361    |         | 1  | 0.141           | 1.01 | 1 |
| osteosarcoma | MNNG HOS  | Selumetinib & Etoposide      | 0.15        | 0.981 | 0.997 | 1.007 | 0.995    |         | 1  | 0.057           | 2.20 | 1 |
| osteosarcoma | MNNG HOS  | Selumetinib & Etoposide      | 0.2         | 0.828 | 0.886 | 0.927 | 0.880    |         | 1  | 0.005           | 0.08 | 1 |
| osteosarcoma | MNNG HOS  | Selumetinib & Topotecan      | 2           | 1.053 | 1.060 | 1.065 | 1.059    |         | 1  | 0.020           | 0.72 | 1 |

| Sarcoma type     | Cell line | Drug combination          | Molar |       |        |         |          | n       | EOHSA  |        | neg log p-Value | n |
|------------------|-----------|---------------------------|-------|-------|--------|---------|----------|---------|--------|--------|-----------------|---|
|                  |           |                           | ratio | CI75  | CI90   | CI95    | CI(mean) | CI(SEM) | (mean) |        |                 |   |
| osteosarcoma     | MNNG HOS  | Selumetinib & Topotecan   | 3     | 0.758 | 0.746  | 0.738   | 0.747    |         | 1      | 0.030  | 1.08            | 1 |
| osteosarcoma     | MNNG HOS  | Sorafenib & Topotecan     | 50    | 1.012 | 1.002  | 1.000   | 1.005    |         | 1      |        |                 |   |
| osteosarcoma     | MNNG HOS  | Sunitinib & Ara-C         | 1     | 0.971 | 0.971  | 0.971   | 0.971    |         | 1      | -0.028 | 0.32            | 1 |
| osteosarcoma     | MNNG HOS  | Sunitinib & Ara-C         | 2     | 0.861 | 0.870  | 0.876   | 0.869    |         | 1      | 0.090  | 3.01            | 1 |
| osteosarcoma     | MNNG HOS  | Vorinostat & Cisplatin    | 0.2   | 0.981 | 0.946  | 0.927   | 0.951    | 0.165   | 3      | 0.042  | 1.17            | 3 |
| osteosarcoma     | MNNG HOS  | Vorinostat & Etoposide    | 2     | 0.779 | 0.861  | 0.951   | 0.864    | 0.274   | 3      | 0.076  | 1.62            | 2 |
| osteosarcoma     | MNNG HOS  | Vorinostat & MK-8669      | 0.05  | 0.990 | 0.992  | 0.995   | 0.992    | 0.496   | 1      |        |                 |   |
| osteosarcoma     | MNNG HOS  | Vorinostat & Topotecan    | 8     | 0.946 | 0.938  | 0.940   | 0.941    | 0.118   | 4      | 0.061  | 1.82            | 3 |
| osteosarcoma     | U2-OS     | Dasatinib & Ara-C         | 1     | 0.497 | 0.485  | 0.478   | 0.487    |         | 1      | 0.105  | 1.97            | 1 |
| osteosarcoma     | U2-OS     | Dasatinib & Gemcitabine   | 10    | 0.368 | 0.367  | 0.367   | 0.367    |         | 1      | 0.213  | 2.61            | 1 |
| osteosarcoma     | U2-OS     | Dasatinib & MK-2206       | 0.2   | 1.304 | 2.091  | 3.050   | 2.005    | 0.655   | 3      | 0.126  | 2.78            | 3 |
| osteosarcoma     | U2-OS     | Dasatinib & MK-2206       | 1     | 0.379 | 0.463  | 0.542   | 0.461    | 0.045   | 3      | 0.176  | 3.72            | 3 |
| osteosarcoma     | U2-OS     | Dasatinib & Triciribine   | 0.1   | 0.353 | 0.367  | 0.377   | 0.366    |         | 1      | 0.270  | 2.78            | 1 |
| osteosarcoma     | U2-OS     | Dasatinib & Triciribine   | 0.25  | 0.078 | 0.076  | 0.074   | 0.076    |         | 1      | 0.424  | 4.00            | 1 |
| osteosarcoma     | U2-OS     | Dasatinib & Triciribine   | 0.5   | 0.068 | 0.064  | 0.061   | 0.064    |         | 1      | 0.451  | 3.92            | 1 |
| osteosarcoma     | U2-OS     | Dasatinib & Triciribine   | 1     | 0.098 | 0.078  | 0.070   | 0.082    | 0.009   | 2      | 0.350  | 5.47            | 2 |
| osteosarcoma     | U2-OS     | Dasatinib & Triciribine   | 2     | 0.097 | 0.049  | 0.031   | 0.059    |         | 1      | 0.361  | 7.94            | 1 |
| osteosarcoma     | U2-OS     | GX15-070 & Dasatinib      | 0.03  | 0.786 | 0.775  | 0.768   | 0.776    |         | 1      | 0.116  | 1.50            | 1 |
| osteosarcoma     | U2-OS     | GX15-070 & Doxorubicin    | 20    | 0.490 | 0.473  | 0.462   | 0.475    | 0.165   | 2      | 0.068  | 1.12            | 2 |
| osteosarcoma     | U2-OS     | GX15-070 & Etoposide      | 0.2   | 0.810 | 0.763  | 0.734   | 0.769    | 0.304   | 3      | 0.139  | 1.68            | 3 |
| osteosarcoma     | U2-OS     | GX15-070 & PXD-101        | 1     | 1.042 | 1.020  | 1.005   | 1.022    |         | 1      | 0.133  | 1.60            | 1 |
| osteosarcoma     | U2-OS     | MK-2206 & Cisplatin       | 0.5   | 1.521 | 1.793  | 2.007   | 1.762    |         | 1      | 0.092  | 2.65            | 1 |
| osteosarcoma     | U2-OS     | MK-2206 & Doxorubicin     | 100   | 0.561 | 0.543  | 0.532   | 0.545    |         | 1      | 0.192  | 6.75            | 1 |
| osteosarcoma     | U2-OS     | MK-2206 & Doxorubicin     | 20    | 0.452 | 0.435  | 0.433   | 0.440    | 0.095   | 5      | 0.228  | 4.12            | 5 |
| osteosarcoma     | U2-OS     | MK-2206 & Doxorubicin     | 5     | 0.514 | 0.511  | 0.510   | 0.512    | 0.062   | 2      | 0.119  | 1.87            | 2 |
| osteosarcoma     | U2-OS     | MK-2206 & Doxorubicin     | 50    | 0.423 | 0.414  | 0.408   | 0.415    | 0.107   | 3      | 0.239  | 6.52            | 3 |
| osteosarcoma     | U2-OS     | MK-2206 & Etoposide       | 1     | 0.606 | 0.659  | 0.710   | 0.658    | 0.137   | 4      | 0.187  | 3.88            | 4 |
| osteosarcoma     | U2-OS     | MK-2206 & Etoposide       | 5     | 0.209 | 0.197  | 0.188   | 0.198    |         | 1      | 0.211  | 4.92            | 1 |
| osteosarcoma     | U2-OS     | MK-2206 & MK-8669         | 0.2   | 0.749 | 7.622  | 132.156 | 5.276    | 4.535   | 9      | 0.205  | 3.21            | 9 |
| osteosarcoma     | U2-OS     | MK-2206 & MK-8669         | 2     | 0.574 | 32.659 | 510.464 | 21.226   |         | 1      | 0.211  | 4.13            | 1 |
| osteosarcoma     | U2-OS     | PXD-101 & Doxorubicin     | 2     | 0.919 | 0.976  | 1.017   | 0.970    |         | 1      | 0.094  | 1.69            | 1 |
| osteosarcoma     | U2-OS     | PXD-101 & Etoposide       | 0.1   | 0.463 | 0.450  | 0.442   | 0.452    |         | 1      | 0.151  | 2.31            | 1 |
| osteosarcoma     | U2-OS     | Rapamycin & Sunitinib     | 10    | 1.114 | 1.114  | 1.115   | 1.114    |         | 1      | 0.000  | 0.14            | 1 |
| osteosarcoma     | U2-OS     | Selumetinib & Doxorubicin | 0.5   | 0.761 | 0.793  | 0.815   | 0.790    |         | 1      | 0.061  | 0.45            | 1 |
| osteosarcoma     | U2-OS     | Selumetinib & Doxorubicin | 10    | 1.013 | 1.079  | 1.128   | 1.073    |         | 1      | 0.116  | 1.40            | 1 |
| osteosarcoma     | U2-OS     | Selumetinib & Etoposide   | 0.2   | 1.368 | 1.355  | 1.347   | 1.357    |         | 1      | 0.014  | 0.15            | 1 |
| osteosarcoma     | U2-OS     | Selumetinib & Topotecan   | 2     | 0.787 | 0.802  | 0.814   | 0.801    |         | 1      | 0.110  | 1.23            | 1 |
| osteosarcoma     | U2-OS     | Sorafenib & Topotecan     | 50    | 0.813 | 0.810  | 0.870   | 0.831    | 0.359   | 3      | 0.022  | 0.84            | 2 |
| osteosarcoma     | U2-OS     | Sorafenib & Topotecan     | 500   | 0.583 | 0.514  | 0.485   | 0.527    | 0.277   | 2      | 0.060  | 1.04            | 1 |
| osteosarcoma     | U2-OS     | Sunitinib & Rapamycin     | 3.75  | 3.590 | 3.418  | 3.307   | 3.436    |         | 1      | -0.205 | 1.43            | 1 |
| osteosarcoma     | U2-OS     | Triciribine & Dasatinib   | 0.5   | 0.097 | 0.087  | 0.081   | 0.088    | 0.029   | 2      | 0.476  | 6.52            | 2 |
| osteosarcoma     | U2-OS     | Triciribine & Topotecan   | 400   | 1.718 | 1.841  | 1.931   | 1.830    |         | 1      | 0.043  | 0.87            | 1 |
| osteosarcoma     | U2-OS     | Vorinostat & Cisplatin    | 0.2   | 2.264 | 2.874  | 3.467   | 2.805    | 2.309   | 5      | 0.048  | 2.88            | 5 |
| osteosarcoma     | U2-OS     | Vorinostat & Etoposide    | 2     | 0.582 | 0.548  | 0.530   | 0.553    | 0.019   | 5      | 0.120  | 3.98            | 5 |
| osteosarcoma     | U2-OS     | Vorinostat & MK-8669      | 0.05  | 1.052 | 1.218  | 1.366   | 1.198    | 0.487   | 2      | 0.150  | 2.93            | 2 |
| osteosarcoma     | U2-OS     | Vorinostat & Topotecan    | 8     | 0.542 | 0.514  | 0.498   | 0.518    | 0.049   | 5      | 0.137  | 4.10            | 5 |
| rhabdomyosarcoma | A-204     | Dasatinib & Gemcitabine   | 25    | 0.665 | 0.620  | 0.592   | 0.626    |         | 1      | 0.243  | 4.68            | 1 |
| rhabdomyosarcoma | A-204     | Dasatinib & Gemcitabine   | 50    | 0.542 | 0.489  | 0.456   | 0.496    |         | 1      | 0.116  | 3.38            | 1 |
| rhabdomyosarcoma | A-204     | Dasatinib & MK-2206       | 1     | 0.150 | 0.140  | 0.137   | 0.142    |         | 1      | 0.381  | 4.49            | 1 |
| rhabdomyosarcoma | A-204     | Dasatinib & Triciribine   | 0.1   | 0.650 | 0.672  | 0.687   | 0.669    | 0.078   | 2      | 0.143  | 2.76            | 2 |
| rhabdomyosarcoma | A-204     | Dasatinib & Triciribine   | 0.125 | 0.325 | 0.310  | 0.300   | 0.312    |         | 1      | 0.183  | 3.85            | 1 |
| rhabdomyosarcoma | A-204     | GX15-070 & Dasatinib      | 0.03  | 0.393 | 0.356  | 0.334   | 0.361    |         | 1      | 0.163  | 2.82            | 1 |
| rhabdomyosarcoma | A-204     | GX15-070 & Doxorubicin    | 20    | 0.620 | 0.603  | 0.592   | 0.605    | 0.141   | 3      | 0.173  | 3.68            | 3 |
| rhabdomyosarcoma | A-204     | GX15-070 & Etoposide      | 0.2   | 1.225 | 1.177  | 1.148   | 1.183    | 0.094   | 2      | 0.067  | 1.04            | 2 |
| rhabdomyosarcoma | A-204     | GX15-070 & Topotecan      | 10    | 0.833 | 0.836  | 0.838   | 0.836    | 0.556   | 2      | 0.088  | 1.49            | 2 |
| rhabdomyosarcoma | A-204     | MK-2206 & Cisplatin       | 0.5   | 1.057 | 1.148  | 1.337   | 1.181    |         | 1      | 0.076  | 2.37            | 1 |
| rhabdomyosarcoma | A-204     | MK-2206 & Doxorubicin     | 20    | 0.559 | 0.593  | 0.628   | 0.593    | 0.097   | 5      | 0.249  | 3.17            | 5 |
| rhabdomyosarcoma | A-204     | MK-2206 & Etoposide       | 1     | 0.523 | 0.552  | 0.579   | 0.551    | 0.106   | 4      | 0.204  | 2.97            | 4 |
| rhabdomyosarcoma | A-204     | MK-2206 & Etoposide       | 5     | 0.952 | 0.959  | 0.970   | 0.960    |         | 1      | 0.081  | 2.33            | 1 |
| rhabdomyosarcoma | A-204     | MK-2206 & MK-8669         | 0.2   | 0.663 | 0.695  | 0.740   | 0.700    | 0.074   | 7      | 0.212  | 3.63            | 7 |
| rhabdomyosarcoma | A-204     | MK-2206 & MK-8669         | 2     | 0.342 | 0.572  | 0.810   | 0.575    |         | 1      | 0.154  | 3.39            | 1 |



| Sarcoma type     | Cell line | Drug combination             | Molar |       |       |        |          |         | n  | EOHSA  |       | neg log p- |  |
|------------------|-----------|------------------------------|-------|-------|-------|--------|----------|---------|----|--------|-------|------------|--|
|                  |           |                              | ratio | CI75  | CI90  | CI95   | CI(mean) | CI(SEM) |    | (mean) | Value | n          |  |
| rhabdomyosarcoma | A-204     | MK-2206 & Topotecan          | 50    | 1.163 | 2.333 | 4.029  | 2.219    |         | 1  | 0.113  | 2.44  | 1          |  |
| rhabdomyosarcoma | A-204     | PXD-101 & Doxorubicin        | 2     | 0.902 | 0.893 | 0.887  | 0.894    |         | 1  | 0.075  | 2.34  | 1          |  |
| rhabdomyosarcoma | A-204     | PXD-101 & Topotecan          | 1     | 1.318 | 1.281 | 1.257  | 1.286    |         | 1  | -0.016 | 0.21  | 1          |  |
| rhabdomyosarcoma | A-204     | Selumetinib & Doxorubicin    | 0.5   | 0.695 | 0.720 | 0.738  | 0.718    |         | 1  | 0.061  | 1.05  | 1          |  |
| rhabdomyosarcoma | A-204     | Selumetinib & Doxorubicin    | 10    | 1.385 | 1.439 | 1.476  | 1.433    |         | 1  | 0.017  | 0.35  | 1          |  |
| rhabdomyosarcoma | A-204     | Selumetinib & Etoposide      | 0.15  | 1.465 | 1.351 | 1.278  | 1.364    |         | 1  | 0.020  | 0.69  | 1          |  |
| rhabdomyosarcoma | A-204     | Selumetinib & Topotecan      | 2     | 1.996 | 2.117 | 2.204  | 2.104    |         | 1  | 0.004  | 0.18  | 1          |  |
| rhabdomyosarcoma | A-204     | Selumetinib & Topotecan      | 3     | 1.070 | 1.055 | 1.046  | 1.057    |         | 1  | 0.030  | 1.37  |            |  |
| rhabdomyosarcoma | A-204     | Sorafenib & Topotecan        | 50    | 0.527 | 0.763 | 1.088  | 0.730    | 0.381   | 3  | 0.149  | 4.41  | 2          |  |
| rhabdomyosarcoma | A-204     | Sorafenib & Topotecan        | 500   | 0.611 | 0.922 | 1.291  | 0.913    | 0.318   | 3  | 0.088  | 2.41  | 2          |  |
| rhabdomyosarcoma | A-204     | Triciribine & Dasatinib      | 0.5   | 1.152 | 0.184 | 0.053  | 0.463    |         | 1  | -0.031 | 0.47  | 1          |  |
| rhabdomyosarcoma | A-204     | Triciribine & Rapamycin      | 0.2   | 0.275 | 0.181 | 0.137  | 0.198    |         | 1  | 0.084  | 2.64  | 1          |  |
| rhabdomyosarcoma | A-204     | Triciribine & Topotecan      | 400   | 0.374 | 0.349 | 0.334  | 0.352    |         | 1  | 0.115  | 3.57  | 1          |  |
| rhabdomyosarcoma | A-204     | Vorinostat & Cisplatin       | 0.2   | 1.652 | 2.105 | 2.546  | 2.072    | 1.147   | 5  | 0.098  | 3.02  | 5          |  |
| rhabdomyosarcoma | A-204     | Vorinostat & Etoposide       | 2     | 0.847 | 0.973 | 1.204  | 0.993    | 0.203   | 5  | 0.094  | 2.58  | 5          |  |
| rhabdomyosarcoma | A-204     | Vorinostat & MK-8669         | 0.05  | 0.911 | 0.864 | 0.837  | 0.870    | 0.025   | 2  | 0.078  | 1.31  | 1          |  |
| rhabdomyosarcoma | A-204     | Vorinostat & MK-8669         | 0.5   | 3.730 | 8.169 | 13.939 | 7.517    |         | 1  |        |       |            |  |
| rhabdomyosarcoma | A-204     | Vorinostat & Topotecan       | 8     | 0.920 | 1.703 | 3.158  | 1.640    | 0.278   | 5  | 0.075  | 2.24  | 5          |  |
| leiomyosarcoma   | SK-LMS-1  | 4-HC & Doxorubicin           | 50    | 1.223 | 1.181 | 1.155  | 1.186    |         | 1  | -0.018 | 0.13  | 1          |  |
| leiomyosarcoma   | SK-LMS-1  | Dasatinib & Ara-C            | 0.2   | 0.194 | 0.205 | 0.213  | 0.204    | 0.044   | 2  | 0.160  | 3.69  | 2          |  |
| leiomyosarcoma   | SK-LMS-1  | Dasatinib & Ara-C            | 1     | 0.483 | 0.489 | 0.495  | 0.489    | 0.138   | 3  | 0.160  | 2.97  | 3          |  |
| leiomyosarcoma   | SK-LMS-1  | Dasatinib & Ara-C            | 5     | 0.308 | 0.291 | 0.281  | 0.293    |         | 1  | 0.264  | 2.61  | 1          |  |
| leiomyosarcoma   | SK-LMS-1  | Dasatinib & Gemcitabine      | 50    | 1.068 | 1.096 | 1.116  | 1.093    |         | 1  | 0.087  | 1.06  | 1          |  |
| leiomyosarcoma   | SK-LMS-1  | Dasatinib & MK-2206          | 0.2   | 0.922 | 0.877 | 0.858  | 0.886    | 0.243   | 3  | 0.038  | 1.22  | 3          |  |
| leiomyosarcoma   | SK-LMS-1  | Dasatinib & MK-2206          | 1     | 0.314 | 0.321 | 0.336  | 0.324    | 0.034   | 3  | 0.208  | 3.69  | 3          |  |
| leiomyosarcoma   | SK-LMS-1  | Dasatinib & Triciribine      | 0.1   | 0.380 | 0.393 | 0.402  | 0.391    | 0.094   | 2  | 0.211  | 2.49  | 2          |  |
| leiomyosarcoma   | SK-LMS-1  | Dasatinib & Triciribine      | 0.125 | 0.370 | 0.351 | 0.339  | 0.353    |         | 1  | 0.158  | 3.06  | 1          |  |
| leiomyosarcoma   | SK-LMS-1  | Dasatinib & Triciribine      | 0.25  | 0.318 | 0.314 | 0.312  | 0.315    |         | 1  | 0.292  | 5.57  | 1          |  |
| leiomyosarcoma   | SK-LMS-1  | Dasatinib & Triciribine      | 0.5   | 0.765 | 0.769 | 0.771  | 0.768    |         | 1  | 0.231  | 3.37  | 1          |  |
| leiomyosarcoma   | SK-LMS-1  | Dasatinib & Triciribine      | 1     | 0.250 | 0.243 | 0.238  | 0.244    | 0.089   | 2  | 0.279  | 3.67  | 2          |  |
| leiomyosarcoma   | SK-LMS-1  | Dasatinib & Triciribine      | 2     | 0.241 | 0.235 | 0.232  | 0.236    | 0.045   | 3  | 0.273  | 4.61  | 3          |  |
| leiomyosarcoma   | SK-LMS-1  | GX15-070 & Dasatinib         | 0.03  | 1.077 | 1.071 | 1.067  | 1.072    | 0.126   | 3  | 0.061  | 1.33  | 3          |  |
| leiomyosarcoma   | SK-LMS-1  | GX15-070 & Doxorubicin       | 20    | 0.894 | 0.872 | 0.857  | 0.875    | 0.084   | 2  | 0.094  | 2.18  | 2          |  |
| leiomyosarcoma   | SK-LMS-1  | GX15-070 & Etoposide         | 0.2   | 0.603 | 0.612 | 0.619  | 0.611    | 0.106   | 2  | 0.166  | 2.38  | 2          |  |
| leiomyosarcoma   | SK-LMS-1  | GX15-070 & PXD-101           | 1     | 1.094 | 1.077 | 1.066  | 1.079    |         | 1  | 0.013  | 0.24  | 1          |  |
| leiomyosarcoma   | SK-LMS-1  | GX15-070 & Topotecan         | 10    | 1.310 | 1.275 | 1.253  | 1.279    | 0.566   | 3  | 0.079  | 4.05  | 3          |  |
| leiomyosarcoma   | SK-LMS-1  | MK-2206 & 4-HC               | 1     | 0.796 | 0.787 | 0.781  | 0.788    |         | 1  | 0.025  | 0.65  | 1          |  |
| leiomyosarcoma   | SK-LMS-1  | MK-2206 & 4-HC & Doxorubicin | 1     | 0.821 | 0.777 | 0.749  | 0.782    |         | 1  | 0.078  | 2.55  | 1          |  |
| leiomyosarcoma   | SK-LMS-1  | MK-2206 & Cisplatin          | 0.5   | 0.944 | 1.384 | 1.850  | 1.333    | 0.548   | 2  | 0.142  | 4.61  | 2          |  |
| leiomyosarcoma   | SK-LMS-1  | MK-2206 & Doxorubicin        | 100   | 0.870 | 0.710 | 0.636  | 0.739    |         | 1  | 0.088  | 2.54  | 1          |  |
| leiomyosarcoma   | SK-LMS-1  | MK-2206 & Doxorubicin        | 20    | 0.693 | 0.694 | 0.704  | 0.697    | 0.088   | 5  | 0.154  | 2.92  | 5          |  |
| leiomyosarcoma   | SK-LMS-1  | MK-2206 & Doxorubicin        | 5     | 0.386 | 0.397 | 0.404  | 0.396    |         | 1  | 0.185  | 3.75  | 1          |  |
| leiomyosarcoma   | SK-LMS-1  | MK-2206 & Doxorubicin        | 50    | 0.735 | 0.706 | 0.688  | 0.709    | 0.089   | 4  | 0.094  | 2.33  | 4          |  |
| leiomyosarcoma   | SK-LMS-1  | MK-2206 & Etoposide          | 1     | 0.611 | 0.595 | 0.589  | 0.598    | 0.074   | 5  | 0.158  | 3.00  | 5          |  |
| leiomyosarcoma   | SK-LMS-1  | MK-2206 & Etoposide          | 5     | 0.350 | 0.308 | 0.286  | 0.315    | 0.234   | 3  | 0.186  | 3.88  | 3          |  |
| leiomyosarcoma   | SK-LMS-1  | MK-2206 & MK-8669            | 0.2   | 0.813 | 0.819 | 0.897  | 0.843    | 0.126   | 10 | 0.159  | 3.37  | 9          |  |
| leiomyosarcoma   | SK-LMS-1  | MK-2206 & MK-8669            | 2     | 0.906 | 0.928 | 0.946  | 0.927    |         | 1  |        |       |            |  |
| leiomyosarcoma   | SK-LMS-1  | MK-2206 & Topotecan          | 50    | 0.306 | 0.293 | 0.297  | 0.299    | 0.029   | 2  | 0.118  | 3.67  | 2          |  |
| leiomyosarcoma   | SK-LMS-1  | Saracatinib & Gemcitabine    | 100   | 1.884 | 1.897 | 1.906  | 1.896    |         | 1  | -0.002 | 0.04  | 1          |  |
| leiomyosarcoma   | SK-LMS-1  | Saracatinib & Triciribine    | 1     | 0.757 | 0.759 | 0.760  | 0.759    |         | 1  | 0.198  | 2.63  | 1          |  |
| leiomyosarcoma   | SK-LMS-1  | Selumetinib & Doxorubicin    | 10    | 1.237 | 1.234 | 1.232  | 1.235    |         | 1  | 0.077  | 0.98  | 1          |  |
| leiomyosarcoma   | SK-LMS-1  | Selumetinib & Topotecan      | 2     | 0.998 | 0.998 | 0.999  | 0.998    |         | 1  | 0.082  | 1.51  | 1          |  |
| leiomyosarcoma   | SK-LMS-1  | Triciribine & Dasatinib      | 0.5   | 0.090 | 0.061 | 0.064  | 0.072    | 0.025   | 3  | 0.286  | 5.89  | 3          |  |
| leiomyosarcoma   | SK-LMS-1  | Triciribine & Dasatinib      | 5     | 0.024 | 0.004 | 0.001  | 0.009    |         | 1  | 0.163  | 1.45  | 1          |  |
| leiomyosarcoma   | SK-LMS-1  | Triciribine & Doxorubicin    | 800   | 1.220 | 1.218 | 1.216  | 1.218    |         | 1  | -0.012 | 0.08  | 1          |  |
| leiomyosarcoma   | SK-LMS-1  | Triciribine & Etoposide      | 40    | 2.977 | 2.949 | 2.930  | 2.952    |         | 1  | -0.120 | 1.94  | 1          |  |
| leiomyosarcoma   | SK-LMS-1  | Triciribine & Rapamycin      | 5     | 2.030 | 3.044 | 4.036  | 2.922    |         | 1  | 0.014  | 0.12  | 1          |  |
| leiomyosarcoma   | SK-LMS-1  | Triciribine & Topotecan      | 400   | 0.858 | 0.835 | 0.820  | 0.838    |         | 1  | 0.044  | 3.78  | 1          |  |
| leiomyosarcoma   | SK-LMS-1  | Vorinostat & Cisplatin       | 0.2   | 0.391 | 0.285 | 0.238  | 0.304    | 0.073   | 4  | 0.132  | 1.88  | 4          |  |
| leiomyosarcoma   | SK-LMS-1  | Vorinostat & Etoposide       | 2     | 0.686 | 0.656 | 0.675  | 0.672    | 0.100   | 3  | 0.093  | 2.23  | 3          |  |
| leiomyosarcoma   | SK-LMS-1  | Vorinostat & MK-8669         | 0.05  | 1.323 | 1.616 | 1.945  | 1.587    | 0.806   | 2  | 0.011  | 0.24  | 2          |  |

| Sarcoma type   | Cell line | Drug combination             | Molar ratio | CI    |       |        |          |       | CI(SEM) | n     | EOHSA  |       | neg log p- |  |
|----------------|-----------|------------------------------|-------------|-------|-------|--------|----------|-------|---------|-------|--------|-------|------------|--|
|                |           |                              |             | CI75  | CI90  | CI95   | CI(mean) | n     |         |       | (mean) | Value | n          |  |
| leiomyosarcoma | SK-LMS-1  | Vorinostat & Topotecan       | 8           | 1.043 | 1.556 | 2.482  | 1.521    | 0.673 | 4       | 0.021 | 0.60   | 4     |            |  |
| leiomyosarcoma | SK-UT-1   | 4-HC & Doxorubicin           | 50          | 1.215 | 1.186 | 1.168  | 1.190    | 0.215 | 2       | 0.022 | 0.74   | 2     |            |  |
| leiomyosarcoma | SK-UT-1   | ABT-888 & Cisplatin          | 5           | 1.192 | 1.238 | 1.270  | 1.234    |       | 1       | 0.051 | 1.89   | 1     |            |  |
| leiomyosarcoma | SK-UT-1   | ABT-888 & Gemcitabine        | 250         | 0.985 | 0.987 | 0.989  | 0.987    |       | 1       | 0.039 | 1.78   | 1     |            |  |
| leiomyosarcoma | SK-UT-1   | Dasatinib & Ara-C            | 1           | 0.157 | 0.149 | 0.143  | 0.150    |       | 1       | 0.214 | 8.70   | 1     |            |  |
| leiomyosarcoma | SK-UT-1   | Dasatinib & Ara-C            | 5           | 0.230 | 0.228 | 0.227  | 0.228    |       | 1       | 0.314 | 5.04   | 1     |            |  |
| leiomyosarcoma | SK-UT-1   | Dasatinib & Doxorubicin      | 1           | 0.415 | 0.386 | 0.367  | 0.389    |       | 1       | 0.120 | 4.48   | 1     |            |  |
| leiomyosarcoma | SK-UT-1   | Dasatinib & Doxorubicin      | 5           | 0.400 | 0.399 | 0.397  | 0.399    |       | 1       | 0.137 | 3.11   |       |            |  |
| leiomyosarcoma | SK-UT-1   | Dasatinib & Etoposide        | 0.2         | 0.091 | 0.210 | 0.380  | 0.227    |       | 1       |       |        |       |            |  |
| leiomyosarcoma | SK-UT-1   | Dasatinib & Etoposide        | 1           | 0.412 | 0.412 | 0.412  | 0.412    | 0.047 | 3       | 0.105 | 1.58   | 2     |            |  |
| leiomyosarcoma | SK-UT-1   | Dasatinib & Gemcitabine      | 10          | 0.269 | 0.262 | 0.258  | 0.263    |       | 1       | 0.134 | 3.00   | 1     |            |  |
| leiomyosarcoma | SK-UT-1   | Dasatinib & MK-2206          | 0.1         | 0.298 | 0.270 | 0.256  | 0.275    |       | 1       | 0.142 | 2.67   | 1     |            |  |
| leiomyosarcoma | SK-UT-1   | Dasatinib & MK-2206          | 0.2         | 0.673 | 0.601 | 0.573  | 0.616    | 0.311 | 2       | 0.104 | 2.29   | 2     |            |  |
| leiomyosarcoma | SK-UT-1   | Dasatinib & MK-2206          | 0.5         | 0.237 | 0.226 | 0.223  | 0.229    |       | 1       | 0.216 | 4.58   | 1     |            |  |
| leiomyosarcoma | SK-UT-1   | Dasatinib & MK-2206          | 1           | 0.120 | 0.119 | 0.121  | 0.120    | 0.095 | 2       | 0.265 | 7.09   | 2     |            |  |
| leiomyosarcoma | SK-UT-1   | Dasatinib & MK-2206          | 2.5         | 0.076 | 0.049 | 0.037  | 0.054    |       | 1       | 0.234 | 10.60  | 1     |            |  |
| leiomyosarcoma | SK-UT-1   | Dasatinib & MK-2206          | 5           | 0.106 | 0.101 | 0.108  | 0.105    | 0.076 | 2       | 0.246 | 7.81   | 2     |            |  |
| leiomyosarcoma | SK-UT-1   | Dasatinib & Topotecan        | 1.3333      | 0.003 | 0.001 | 0.000  | 0.001    |       | 1       |       |        |       |            |  |
| leiomyosarcoma | SK-UT-1   | Dasatinib & Topotecan        | 10          | 0.297 | 0.303 | 0.307  | 0.302    |       | 1       | 0.151 | 1.90   | 1     |            |  |
| leiomyosarcoma | SK-UT-1   | Dasatinib & Topotecan        | 100         | 0.232 | 0.283 | 0.324  | 0.280    |       | 1       |       |        |       |            |  |
| leiomyosarcoma | SK-UT-1   | Dasatinib & Topotecan        | 13.333      | 0.012 | 0.002 | 0.001  | 0.005    |       | 1       |       |        |       |            |  |
| leiomyosarcoma | SK-UT-1   | Dasatinib & Topotecan        | 500         | 0.398 | 0.473 | 0.642  | 0.504    | 0.140 | 2       |       |        |       |            |  |
| leiomyosarcoma | SK-UT-1   | Dasatinib & Triciribine      | 0.1         | 0.239 | 0.248 | 0.254  | 0.247    |       | 1       | 0.356 | 5.84   | 1     |            |  |
| leiomyosarcoma | SK-UT-1   | Dasatinib & Triciribine      | 0.2         | 0.743 | 0.796 | 0.834  | 0.791    |       | 1       | 0.105 | 3.71   | 1     |            |  |
| leiomyosarcoma | SK-UT-1   | Dasatinib & Triciribine      | 2           | 0.282 | 0.264 | 0.253  | 0.266    |       | 1       | 0.182 | 3.82   | 1     |            |  |
| leiomyosarcoma | SK-UT-1   | GX15-070 & Dasatinib         | 0.03        | 0.785 | 0.773 | 0.764  | 0.774    | 0.018 | 3       | 0.125 | 1.71   | 3     |            |  |
| leiomyosarcoma | SK-UT-1   | GX15-070 & Doxorubicin       | 2           | 0.982 | 0.973 | 0.967  | 0.974    |       | 1       | 0.000 | 0.04   | 1     |            |  |
| leiomyosarcoma | SK-UT-1   | GX15-070 & Doxorubicin       | 20          | 1.097 | 1.078 | 1.065  | 1.080    |       | 1       | 0.006 | 0.50   | 1     |            |  |
| leiomyosarcoma | SK-UT-1   | GX15-070 & Etoposide         | 0.2         | 0.534 | 0.545 | 0.553  | 0.544    |       | 1       | 0.081 | 2.01   | 1     |            |  |
| leiomyosarcoma | SK-UT-1   | GX15-070 & PXD-101           | 1           | 0.804 | 0.815 | 0.822  | 0.814    | 0.037 | 2       | 0.110 | 1.64   | 2     |            |  |
| leiomyosarcoma | SK-UT-1   | GX15-070 & Topotecan         | 1           | 0.755 | 0.773 | 0.786  | 0.771    |       | 1       | 0.012 | 0.54   | 1     |            |  |
| leiomyosarcoma | SK-UT-1   | GX15-070 & Topotecan         | 10          | 1.016 | 0.984 | 0.962  | 0.987    |       | 1       | 0.053 | 3.46   | 1     |            |  |
| leiomyosarcoma | SK-UT-1   | GX15-070 & Vorinostat        | 0.03        | 1.196 | 1.204 | 1.210  | 1.204    |       | 1       | 0.031 | 0.98   | 1     |            |  |
| leiomyosarcoma | SK-UT-1   | GX15-070 & Vorinostat        | 0.06        | 1.154 | 1.173 | 1.187  | 1.171    | 0.050 | 2       | 0.108 | 1.46   | 2     |            |  |
| leiomyosarcoma | SK-UT-1   | MK-2206 & 4-HC               | 1           | 0.956 | 0.978 | 0.994  | 0.976    | 0.376 | 2       | 0.047 | 2.03   | 2     |            |  |
| leiomyosarcoma | SK-UT-1   | MK-2206 & 4-HC & Doxorubicin | 1           | 0.775 | 0.781 | 0.786  | 0.780    | 0.146 | 3       | 0.086 | 2.27   | 3     |            |  |
| leiomyosarcoma | SK-UT-1   | MK-2206 & Cisplatin          | 0.5         | 1.533 | 2.716 | 4.175  | 2.580    | 0.506 | 3       | 0.122 | 4.76   | 3     |            |  |
| leiomyosarcoma | SK-UT-1   | MK-2206 & Cisplatin          | 0.6667      | 1.216 | 1.192 | 1.230  | 1.213    |       | 1       | 0.114 | 4.47   | 1     |            |  |
| leiomyosarcoma | SK-UT-1   | MK-2206 & Dasatinib          | 1           | 0.114 | 0.462 | 1.196  | 0.591    |       | 1       | 0.495 | 4.08   | 1     |            |  |
| leiomyosarcoma | SK-UT-1   | MK-2206 & Doxorubicin        | 100         | 0.523 | 0.580 | 0.623  | 0.576    |       | 1       | 0.251 | 3.65   | 1     |            |  |
| leiomyosarcoma | SK-UT-1   | MK-2206 & Doxorubicin        | 5           | 0.880 | 0.872 | 0.867  | 0.873    |       | 1       | 0.081 | 5.55   | 1     |            |  |
| leiomyosarcoma | SK-UT-1   | MK-2206 & Doxorubicin        | 50          | 0.632 | 0.614 | 0.602  | 0.616    | 0.078 | 6       | 0.134 | 2.89   | 6     |            |  |
| leiomyosarcoma | SK-UT-1   | MK-2206 & Etoposide          | 5           | 0.469 | 0.664 | 0.921  | 0.685    | 0.282 | 3       | 0.214 | 4.10   | 3     |            |  |
| leiomyosarcoma | SK-UT-1   | MK-2206 & Etoposide          | 6.6667      | 0.242 | 0.206 | 0.200  | 0.216    |       | 1       | 0.230 | 6.22   | 1     |            |  |
| leiomyosarcoma | SK-UT-1   | MK-2206 & MK-8669            | 0.2         | 0.581 | 0.933 | 1.501  | 0.913    | 0.161 | 12      | 0.227 | 4.90   | 9     |            |  |
| leiomyosarcoma | SK-UT-1   | MK-2206 & MK-8669            | 2           | 0.192 | 0.652 | 1.529  | 0.645    | 0.281 | 2       | 0.191 | 4.33   | 2     |            |  |
| leiomyosarcoma | SK-UT-1   | MK-2206 & Topotecan          | 50          | 0.574 | 0.748 | 0.925  | 0.749    | 0.044 | 3       | 0.120 | 3.53   | 3     |            |  |
| leiomyosarcoma | SK-UT-1   | MK-2206 & Topotecan          | 500         | 1.596 | 6.632 | 19.574 | 5.917    |       | 1       | 0.138 | 3.62   | 1     |            |  |
| leiomyosarcoma | SK-UT-1   | MK-2206 & Topotecan          | 66.667      | 0.449 | 0.391 | 0.366  | 0.402    |       | 1       | 0.184 | 5.70   | 1     |            |  |
| leiomyosarcoma | SK-UT-1   | MK-8669 & MK-2206            | 0.2         | 1.009 | 1.024 | 1.035  | 1.022    |       | 1       | 0.103 | 1.79   | 1     |            |  |
| leiomyosarcoma | SK-UT-1   | MK-8669 & MK-2206            | 5           | 0.642 | 0.612 | 0.671  | 0.642    | 0.104 | 3       |       |        |       |            |  |
| leiomyosarcoma | SK-UT-1   | PXD-101 & Doxorubicin        | 2           | 0.881 | 0.876 | 0.873  | 0.876    | 0.032 | 2       | 0.105 | 4.74   | 1     |            |  |
| leiomyosarcoma | SK-UT-1   | PXD-101 & Etoposide          | 0.1         | 0.780 | 0.759 | 0.745  | 0.761    | 0.020 | 2       | 0.094 | 3.54   | 1     |            |  |
| leiomyosarcoma | SK-UT-1   | PXD-101 & Topotecan          | 1           | 0.613 | 0.593 | 0.579  | 0.595    | 0.052 | 2       | 0.083 | 3.53   | 1     |            |  |
| leiomyosarcoma | SK-UT-1   | Rapamycin & Ara-C            | 10          | 0.520 | 0.531 | 0.538  | 0.530    |       | 1       | 0.099 | 2.45   | 1     |            |  |
| leiomyosarcoma | SK-UT-1   | Selumetinib & Doxorubicin    | 0.5         | 0.789 | 0.762 | 0.744  | 0.765    |       | 1       | 0.024 | 0.40   | 1     |            |  |
| leiomyosarcoma | SK-UT-1   | Selumetinib & Doxorubicin    | 10          | 0.951 | 0.911 | 0.885  | 0.916    |       | 1       | 0.111 | 1.27   | 1     |            |  |
| leiomyosarcoma | SK-UT-1   | Selumetinib & Etoposide      | 0.15        | 1.007 | 0.990 | 0.979  | 0.992    |       | 1       | 0.024 | 0.92   | 1     |            |  |
| leiomyosarcoma | SK-UT-1   | Selumetinib & Etoposide      | 0.2         | 0.802 | 0.788 | 0.779  | 0.790    |       | 1       | 0.069 | 1.45   | 1     |            |  |
| leiomyosarcoma | SK-UT-1   | Selumetinib & Topotecan      | 2           | 1.033 | 0.989 | 0.960  | 0.994    |       | 1       | 0.007 | 0.28   | 1     |            |  |
| leiomyosarcoma | SK-UT-1   | Selumetinib & Topotecan      | 3           | 0.928 | 0.923 | 0.920  | 0.923    |       | 1       | 0.024 | 0.71   | 1     |            |  |

| Sarcoma type   | Cell line | Drug combination             | Molar  |       |       |       |          |         |    | EOHSA  |       |   | neg log p- |  |
|----------------|-----------|------------------------------|--------|-------|-------|-------|----------|---------|----|--------|-------|---|------------|--|
|                |           |                              | ratio  | CI75  | CI90  | CI95  | CI(mean) | CI(SEM) | n  | (mean) | Value | n |            |  |
| leiomyosarcoma | SK-UT-1   | Sunitinib & Ara-C            | 2      | 1.561 | 1.597 | 1.622 | 1.593    |         | 1  | 0.072  | 1.99  | 1 |            |  |
| leiomyosarcoma | SK-UT-1   | Vorinostat & Cisplatin       | 0.2    | 0.751 | 0.660 | 0.615 | 0.675    | 0.360   | 3  | 0.048  | 3.66  | 2 |            |  |
| leiomyosarcoma | SK-UT-1   | Vorinostat & Etoposide       | 2      | 0.729 | 0.691 | 0.679 | 0.700    | 0.174   | 3  | 0.112  | 5.39  | 2 |            |  |
| leiomyosarcoma | SK-UT-1   | Vorinostat & MK-8669         | 0.05   | 0.934 | 0.990 | 1.033 | 0.986    |         | 1  |        |       |   |            |  |
| leiomyosarcoma | SK-UT-1   | Vorinostat & MK-8669         | 0.5    | 0.335 | 1.083 | 2.414 | 0.957    |         | 1  |        |       |   |            |  |
| leiomyosarcoma | SK-UT-1   | Vorinostat & Topotecan       | 8      | 0.537 | 0.377 | 0.309 | 0.408    | 0.067   | 3  | 0.079  | 3.28  | 2 |            |  |
| liposarcoma    | SW-872    | 4-HC & Doxorubicin           | 50     | 1.294 | 1.277 | 1.266 | 1.279    | 0.199   | 2  | 0.020  | 0.94  | 2 |            |  |
| liposarcoma    | SW-872    | ABT-888 & Cisplatin          | 5      | 1.168 | 1.215 | 1.248 | 1.210    |         | 1  | -0.010 | 0.08  | 1 |            |  |
| liposarcoma    | SW-872    | ABT-888 & Gemcitabine        | 250    | 1.052 | 1.060 | 1.066 | 1.059    |         | 1  | 0.023  | 0.65  | 1 |            |  |
| liposarcoma    | SW-872    | ABT-888 & Triciribine        | 2.5    | 0.781 | 0.774 | 0.769 | 0.775    |         | 1  | 0.069  | 1.39  | 1 |            |  |
| liposarcoma    | SW-872    | Dasatinib & Ara-C            | 1      | 0.387 | 0.343 | 0.316 | 0.349    |         | 1  | 0.312  | 5.81  | 1 |            |  |
| liposarcoma    | SW-872    | Dasatinib & Ara-C            | 5      | 0.172 | 0.167 | 0.163 | 0.167    | 0.020   | 2  | 0.335  | 4.87  | 2 |            |  |
| liposarcoma    | SW-872    | Dasatinib & Doxorubicin      | 1      | 0.170 | 0.149 | 0.136 | 0.152    |         | 1  | 0.237  | 5.38  | 1 |            |  |
| liposarcoma    | SW-872    | Dasatinib & Doxorubicin      | 5      | 0.329 | 0.303 | 0.286 | 0.306    |         | 1  | 0.210  | 3.48  | 1 |            |  |
| liposarcoma    | SW-872    | Dasatinib & Etoposide        | 0.2    | 0.254 | 0.505 | 1.076 | 0.612    |         | 1  |        |       |   |            |  |
| liposarcoma    | SW-872    | Dasatinib & Etoposide        | 1      | 0.449 | 0.462 | 0.503 | 0.471    | 0.052   | 4  | 0.194  | 3.56  | 2 |            |  |
| liposarcoma    | SW-872    | Dasatinib & Gemcitabine      | 10     | 0.214 | 0.224 | 0.231 | 0.223    | 0.032   | 2  | 0.185  | 2.52  | 2 |            |  |
| liposarcoma    | SW-872    | Dasatinib & MK-2206          | 0.1    | 0.258 | 0.304 | 0.370 | 0.310    |         | 1  | 0.201  | 2.59  | 1 |            |  |
| liposarcoma    | SW-872    | Dasatinib & MK-2206          | 0.2    | 0.397 | 0.513 | 0.642 | 0.517    | 0.352   | 3  | 0.190  | 3.03  | 3 |            |  |
| liposarcoma    | SW-872    | Dasatinib & MK-2206          | 0.5    | 0.291 | 0.414 | 0.588 | 0.431    |         | 1  | 0.245  | 5.68  | 1 |            |  |
| liposarcoma    | SW-872    | Dasatinib & MK-2206          | 1      | 0.200 | 0.542 | 1.135 | 0.544    | 0.241   | 4  | 0.151  | 3.96  | 4 |            |  |
| liposarcoma    | SW-872    | Dasatinib & MK-2206          | 2.5    | 0.169 | 0.258 | 0.344 | 0.257    |         | 1  | 0.165  | 5.61  | 1 |            |  |
| liposarcoma    | SW-872    | Dasatinib & Topotecan        | 1.3333 | 0.132 | 0.144 | 0.170 | 0.149    |         | 1  |        |       |   |            |  |
| liposarcoma    | SW-872    | Dasatinib & Topotecan        | 10     | 0.355 | 0.336 | 0.324 | 0.339    | 0.045   | 2  | 0.190  | 3.54  | 2 |            |  |
| liposarcoma    | SW-872    | Dasatinib & Topotecan        | 100    | 0.540 | 0.668 | 0.836 | 0.681    | 0.070   | 3  |        |       |   |            |  |
| liposarcoma    | SW-872    | Dasatinib & Topotecan        | 13.333 | 0.127 | 0.012 | 0.004 | 0.048    |         | 1  |        |       |   |            |  |
| liposarcoma    | SW-872    | Dasatinib & Topotecan        | 500    | 0.311 | 0.118 | 0.067 | 0.165    | 0.076   | 2  |        |       |   |            |  |
| liposarcoma    | SW-872    | Dasatinib & Triciribine      | 0.1    | 0.443 | 0.446 | 0.448 | 0.446    |         | 1  | 0.252  | 3.96  | 1 |            |  |
| liposarcoma    | SW-872    | Dasatinib & Triciribine      | 0.2    | 0.613 | 0.626 | 0.635 | 0.625    |         | 1  | 0.158  | 3.59  | 1 |            |  |
| liposarcoma    | SW-872    | Dasatinib & Triciribine      | 0.5    | 0.102 | 0.099 | 0.097 | 0.099    | 0.039   | 2  | 0.368  | 6.44  | 2 |            |  |
| liposarcoma    | SW-872    | GX15-070 & Dasatinib         | 0.03   | 1.073 | 1.055 | 1.042 | 1.057    | 0.149   | 3  | 0.083  | 1.80  | 3 |            |  |
| liposarcoma    | SW-872    | GX15-070 & Doxorubicin       | 2      | 1.389 | 1.365 | 1.350 | 1.368    |         | 1  | 0.022  | 1.47  | 1 |            |  |
| liposarcoma    | SW-872    | GX15-070 & Etoposide         | 0.02   | 1.063 | 1.046 | 1.035 | 1.048    |         | 1  | -0.003 | 0.05  | 1 |            |  |
| liposarcoma    | SW-872    | GX15-070 & PXD-101           | 1      | 1.116 | 1.167 | 1.205 | 1.163    |         | 1  | 0.072  | 1.70  | 1 |            |  |
| liposarcoma    | SW-872    | GX15-070 & Topotecan         | 1      | 1.203 | 1.191 | 1.182 | 1.192    |         | 1  | -0.010 | 0.47  | 1 |            |  |
| liposarcoma    | SW-872    | GX15-070 & Vorinostat        | 0.06   | 1.871 | 1.912 | 1.940 | 1.908    | 0.016   | 2  | 0.022  | 0.36  | 2 |            |  |
| liposarcoma    | SW-872    | MK-2206 & 4-HC               | 1      | 0.895 | 0.890 | 0.888 | 0.891    | 0.077   | 2  | 0.065  | 1.93  | 2 |            |  |
| liposarcoma    | SW-872    | MK-2206 & 4-HC & Doxorubicin | 1      | 0.833 | 0.829 | 0.826 | 0.829    | 0.128   | 3  | 0.077  | 2.37  | 3 |            |  |
| liposarcoma    | SW-872    | MK-2206 & Cisplatin          | 0.5    | 1.380 | 1.384 | 1.390 | 1.385    | 0.140   | 3  | -0.010 | 0.30  | 3 |            |  |
| liposarcoma    | SW-872    | MK-2206 & Cisplatin          | 0.6667 | 2.015 | 2.155 | 2.281 | 2.147    |         | 1  | 0.036  | 1.19  | 1 |            |  |
| liposarcoma    | SW-872    | MK-2206 & Dasatinib          | 1      | 0.256 | 0.342 | 0.416 | 0.338    |         | 1  | 0.368  | 4.15  | 1 |            |  |
| liposarcoma    | SW-872    | MK-2206 & Doxorubicin        | 100    | 0.736 | 0.764 | 0.785 | 0.762    |         | 1  | 0.186  | 3.55  | 1 |            |  |
| liposarcoma    | SW-872    | MK-2206 & Doxorubicin        | 5      | 0.738 | 0.740 | 0.742 | 0.740    |         | 1  | 0.104  | 4.34  | 1 |            |  |
| liposarcoma    | SW-872    | MK-2206 & Doxorubicin        | 50     | 0.724 | 0.693 | 0.675 | 0.697    | 0.101   | 6  | 0.146  | 2.59  | 6 |            |  |
| liposarcoma    | SW-872    | MK-2206 & Etoposide          | 5      | 0.582 | 0.628 | 0.670 | 0.627    | 0.035   | 2  | 0.179  | 3.00  | 2 |            |  |
| liposarcoma    | SW-872    | MK-2206 & MK-8669            | 0.2    | 0.862 | 1.240 | 2.042 | 1.213    | 0.105   | 10 | 0.221  | 4.84  | 7 |            |  |
| liposarcoma    | SW-872    | MK-2206 & MK-8669            | 2      | 0.189 | 0.357 | 0.552 | 0.366    |         | 1  | 0.183  | 2.63  | 1 |            |  |
| liposarcoma    | SW-872    | MK-2206 & Topotecan          | 50     | 0.509 | 0.510 | 0.520 | 0.513    | 0.066   | 3  | 0.104  | 1.82  | 3 |            |  |
| liposarcoma    | SW-872    | MK-2206 & Topotecan          | 500    | 0.486 | 0.756 | 1.023 | 0.755    |         | 1  | 0.128  | 1.80  | 1 |            |  |
| liposarcoma    | SW-872    | MK-8669 & MK-2206            | 5      | 1.164 | 1.669 | 2.744 | 1.631    | 0.319   | 3  |        |       |   |            |  |
| liposarcoma    | SW-872    | PXD-101 & Doxorubicin        | 2      | 0.827 | 0.795 | 0.774 | 0.799    |         | 1  |        |       |   |            |  |
| liposarcoma    | SW-872    | PXD-101 & Etoposide          | 0.1    | 0.768 | 0.736 | 0.716 | 0.740    |         | 1  |        |       |   |            |  |
| liposarcoma    | SW-872    | PXD-101 & Topotecan          | 1      | 0.884 | 0.863 | 0.850 | 0.866    |         | 1  |        |       |   |            |  |
| liposarcoma    | SW-872    | Rapamycin & Sunitinib        | 10     | 0.740 | 0.846 | 0.926 | 0.837    |         | 1  | 0.045  | 0.75  | 1 |            |  |
| liposarcoma    | SW-872    | Saracatinib & Ara-C          | 10     | 0.288 | 0.280 | 0.275 | 0.281    |         | 1  | 0.303  | 5.29  | 1 |            |  |
| liposarcoma    | SW-872    | Saracatinib & Gemcitabine    | 100    | 0.696 | 0.689 | 0.684 | 0.690    |         | 1  | 0.125  | 2.35  | 1 |            |  |
| liposarcoma    | SW-872    | Selumetinib & Doxorubicin    | 0.5    | 0.833 | 0.823 | 0.817 | 0.824    |         | 1  | 0.041  | 2.20  | 1 |            |  |
| liposarcoma    | SW-872    | Selumetinib & Doxorubicin    | 10     | 1.075 | 1.016 | 0.978 | 1.023    |         | 1  | 0.139  | 1.78  | 1 |            |  |
| liposarcoma    | SW-872    | Selumetinib & Etoposide      | 0.15   | 0.922 | 0.906 | 0.896 | 0.908    |         | 1  | 0.101  | 4.57  | 1 |            |  |
| liposarcoma    | SW-872    | Selumetinib & Topotecan      | 2      | 1.128 | 1.113 | 1.103 | 1.115    |         | 1  | 0.029  | 1.39  | 1 |            |  |
| liposarcoma    | SW-872    | Selumetinib & Topotecan      | 3      | 1.076 | 1.052 | 1.036 | 1.055    |         | 1  | 0.013  | 0.70  | 1 |            |  |

| Sarcoma type | Cell line | Drug combination          | Molar  |       |       |       | CI(mean) | CI(SEM) | n | EOHSA<br>(mean) | neg log p-<br>Value | n |
|--------------|-----------|---------------------------|--------|-------|-------|-------|----------|---------|---|-----------------|---------------------|---|
|              |           |                           | ratio  | CI75  | CI90  | CI95  |          |         |   |                 |                     |   |
| liposarcoma  | SW-872    | Sunitinib & Ara-C         | 1      | 1.083 | 1.024 | 0.986 | 1.031    |         | 1 | 0.008           | 0.17                | 1 |
| liposarcoma  | SW-872    | Sunitinib & Ara-C         | 2      | 1.821 | 1.765 | 1.728 | 1.772    |         | 1 | 0.009           | 0.07                | 1 |
| liposarcoma  | SW-872    | Vorinostat & Cisplatin    | 0.2    | 0.746 | 0.642 | 0.585 | 0.658    | 0.243   | 4 | 0.068           | 2.16                | 3 |
| liposarcoma  | SW-872    | Vorinostat & Etoposide    | 2      | 0.532 | 0.435 | 0.384 | 0.450    | 0.152   | 3 | 0.185           | 3.00                | 2 |
| liposarcoma  | SW-872    | Vorinostat & MK-8669      | 0.05   | 1.170 | 1.136 | 1.115 | 1.140    | 0.570   | 1 |                 |                     |   |
| liposarcoma  | SW-872    | Vorinostat & Topotecan    | 8      | 0.711 | 0.710 | 0.717 | 0.713    | 0.131   | 4 | 0.053           | 1.41                | 3 |
| fibrosarcoma | HT-1080   | Dasatinib & Ara-C         | 1      | 0.629 | 0.620 | 0.614 | 0.621    | 0.264   | 2 | 0.115           | 3.04                | 2 |
| fibrosarcoma | HT-1080   | Dasatinib & Ara-C         | 5      | 0.383 | 0.370 | 0.362 | 0.372    | 0.074   | 3 | 0.244           | 4.98                | 3 |
| fibrosarcoma | HT-1080   | Dasatinib & Ara-C         | 50     | 0.373 | 0.360 | 0.351 | 0.361    |         | 1 | 0.202           | 3.26                | 1 |
| fibrosarcoma | HT-1080   | Dasatinib & Gemcitabine   | 50     | 0.872 | 0.859 | 0.851 | 0.860    |         | 1 | 0.073           | 1.35                | 1 |
| fibrosarcoma | HT-1080   | Dasatinib & MK-2206       | 0.2    | 1.464 | 2.250 | 3.087 | 2.193    | 1.132   | 3 | 0.082           | 1.83                | 3 |
| fibrosarcoma | HT-1080   | Dasatinib & MK-2206       | 1      | 0.389 | 0.554 | 0.764 | 0.569    | 0.173   | 3 | 0.182           | 2.87                | 3 |
| fibrosarcoma | HT-1080   | Dasatinib & Triciribine   | 0.1    | 0.413 | 0.427 | 0.437 | 0.426    |         | 1 | 0.297           | 3.39                | 1 |
| fibrosarcoma | HT-1080   | Dasatinib & Triciribine   | 0.125  | 0.212 | 0.210 | 0.209 | 0.210    | 0.127   | 2 | 0.271           | 6.39                | 2 |
| fibrosarcoma | HT-1080   | Dasatinib & Triciribine   | 0.25   | 0.121 | 0.116 | 0.113 | 0.117    | 0.067   | 2 | 0.359           | 7.83                | 2 |
| fibrosarcoma | HT-1080   | Dasatinib & Triciribine   | 0.5    | 0.326 | 0.340 | 0.350 | 0.339    |         | 1 | 0.240           | 3.74                | 1 |
| fibrosarcoma | HT-1080   | Dasatinib & Triciribine   | 1      | 0.140 | 0.133 | 0.128 | 0.133    |         | 1 | 0.279           | 3.64                | 1 |
| fibrosarcoma | HT-1080   | GX15-070 & Dasatinib      | 0.03   | 0.780 | 0.771 | 0.765 | 0.772    | 0.002   | 2 | 0.128           | 3.35                | 2 |
| fibrosarcoma | HT-1080   | GX15-070 & Doxorubicin    | 2      | 1.667 | 1.649 | 1.637 | 1.651    |         | 1 | -0.010          | 0.13                | 1 |
| fibrosarcoma | HT-1080   | GX15-070 & Doxorubicin    | 20     | 0.992 | 1.034 | 1.066 | 1.031    | 0.048   | 2 | 0.119           | 2.60                | 2 |
| fibrosarcoma | HT-1080   | GX15-070 & Etoposide      | 0.02   | 1.041 | 1.040 | 1.040 | 1.041    |         | 1 | 0.017           | 0.59                | 1 |
| fibrosarcoma | HT-1080   | GX15-070 & Etoposide      | 0.2    | 0.805 | 0.755 | 0.728 | 0.763    | 0.184   | 3 | 0.158           | 1.84                | 3 |
| fibrosarcoma | HT-1080   | GX15-070 & Etoposide      | 1      | 1.042 | 1.025 | 1.014 | 1.027    |         | 1 | 0.006           | 0.17                | 1 |
| fibrosarcoma | HT-1080   | GX15-070 & Topotecan      | 1      | 1.261 | 1.293 | 1.315 | 1.290    |         | 1 | 0.016           | 0.63                | 1 |
| fibrosarcoma | HT-1080   | GX15-070 & Topotecan      | 10     | 1.103 | 1.140 | 1.167 | 1.137    | 0.317   | 2 | 0.073           | 2.37                | 2 |
| fibrosarcoma | HT-1080   | MK-2206 & Cisplatin       | 0.5    | 0.634 | 0.661 | 0.682 | 0.659    | 0.019   | 2 | 0.140           | 2.86                | 2 |
| fibrosarcoma | HT-1080   | MK-2206 & Doxorubicin     | 100    | 0.786 | 0.725 | 0.697 | 0.736    |         | 1 | 0.219           | 5.53                | 1 |
| fibrosarcoma | HT-1080   | MK-2206 & Doxorubicin     | 20     | 0.585 | 0.590 | 0.598 | 0.591    | 0.114   | 4 | 0.260           | 3.16                | 4 |
| fibrosarcoma | HT-1080   | MK-2206 & Doxorubicin     | 25     | 0.834 | 0.853 | 0.868 | 0.852    |         | 1 | 0.035           | 1.20                | 1 |
| fibrosarcoma | HT-1080   | MK-2206 & Doxorubicin     | 50     | 0.413 | 0.436 | 0.453 | 0.434    | 0.013   | 2 | 0.202           | 5.60                | 2 |
| fibrosarcoma | HT-1080   | MK-2206 & Etoposide       | 1      | 0.746 | 0.782 | 0.817 | 0.782    | 0.138   | 4 | 0.161           | 3.14                | 4 |
| fibrosarcoma | HT-1080   | MK-2206 & Etoposide       | 5      | 0.178 | 0.149 | 0.135 | 0.154    | 0.077   | 2 | 0.168           | 3.11                | 2 |
| fibrosarcoma | HT-1080   | MK-2206 & MK-8669         | 0.2    | 0.822 | 0.842 | 0.871 | 0.845    | 0.124   | 9 | 0.321           | 3.30                | 8 |
| fibrosarcoma | HT-1080   | MK-2206 & MK-8669         | 2      | 0.288 | 0.309 | 0.325 | 0.307    |         | 1 |                 |                     |   |
| fibrosarcoma | HT-1080   | MK-2206 & Topotecan       | 50     | 0.034 | 0.010 | 0.005 | 0.016    |         | 1 | 0.097           | 1.86                | 1 |
| fibrosarcoma | HT-1080   | PXD-101 & Doxorubicin     | 2      | 0.619 | 0.635 | 0.645 | 0.633    |         | 1 | 0.094           | 1.91                | 1 |
| fibrosarcoma | HT-1080   | PXD-101 & Etoposide       | 0.1    | 0.709 | 0.692 | 0.681 | 0.694    | 0.198   | 2 | 0.095           | 1.62                | 2 |
| fibrosarcoma | HT-1080   | PXD-101 & Topotecan       | 0.3333 |       |       |       |          |         |   | 0.138           | 2.83                | 1 |
| fibrosarcoma | HT-1080   | PXD-101 & Topotecan       | 1      | 1.072 | 1.070 | 1.069 | 1.070    | 0.677   | 2 | 0.044           | 1.87                | 2 |
| fibrosarcoma | HT-1080   | Saracatinib & Ara-C       | 10     | 0.742 | 0.767 | 0.785 | 0.765    |         | 1 | 0.082           | 1.27                | 1 |
| fibrosarcoma | HT-1080   | Selumetinib & Doxorubicin | 0.5    | 1.092 | 1.044 | 1.013 | 1.049    |         | 1 | 0.014           | 0.18                | 1 |
| fibrosarcoma | HT-1080   | Selumetinib & Etoposide   | 0.15   | 0.287 | 0.273 | 0.264 | 0.275    |         | 1 | 0.113           | 2.46                | 1 |
| fibrosarcoma | HT-1080   | Sunitinib & Ara-C         | 2      | 3.288 | 3.091 | 2.964 | 3.111    |         | 1 | -0.209          | 1.34                | 1 |
| fibrosarcoma | HT-1080   | Triciribine & Dasatinib   | 0.5    | 0.157 | 0.128 | 0.111 | 0.132    |         | 1 | 0.317           | 6.25                | 1 |
| fibrosarcoma | HT-1080   | Triciribine & Dasatinib   | 5      | 0.050 | 0.022 | 0.014 | 0.029    |         | 1 | 0.321           | 4.31                | 1 |
| fibrosarcoma | HT-1080   | Triciribine & Doxorubicin | 800    | 0.575 | 0.557 | 0.545 | 0.559    |         | 1 | 0.140           | 3.62                | 1 |
| fibrosarcoma | HT-1080   | Triciribine & Topotecan   | 400    | 0.666 | 0.656 | 0.649 | 0.657    |         | 1 | 0.098           | 3.50                | 1 |
| fibrosarcoma | HT-1080   | Vorinostat & Cisplatin    | 0.2    | 1.837 | 2.788 | 3.808 | 2.668    | 2.450   | 5 | 0.149           | 2.81                | 5 |
| fibrosarcoma | HT-1080   | Vorinostat & Etoposide    | 2      | 0.230 | 0.183 | 0.163 | 0.192    | 0.038   | 5 | 0.240           | 2.79                | 5 |
| fibrosarcoma | HT-1080   | Vorinostat & MK-8669      | 0.05   | 0.960 | 0.998 | 1.037 | 0.999    | 0.218   | 2 | 0.151           | 2.00                | 2 |
| fibrosarcoma | HT-1080   | Vorinostat & Topotecan    | 8      | 0.223 | 0.194 | 0.195 | 0.204    | 0.034   | 5 | 0.261           | 3.50                | 5 |



Supplemental Table 2S. Sequential drug combination effect summary. The sarcoma cell line and molar drug ratio for each drug combination is indicated. Time1 indicates first drug incubation time (hours) for first drug listed in combination. Time2 indicates incubation time (hours) for secondary drug(s) added. Combination index (CI) values for effect levels of 0.75, 0.9 and 0.95 were calculated for each independent experiment by the method of Chou and Talalay and the mean CI value “CI(mean)” was calculated using the CI for each effect level. The standard error of the mean for CI values across independent experiments are shown “CI(SEM)”. EoHSA values and level of significance are represented in EoHSA(mean) and –log p-Value columns, respectively. Each line represents the calculated mean value for the number of independent experiments (n).

| Sarcoma type | Cell line | Drug combination          | Molar ratio | Time1 | Time2 | CI75  | CI90   | CI95   | CI(mean) | CI(SEM) | n | EoHSA (mean) | neg log p-Value | n |
|--------------|-----------|---------------------------|-------------|-------|-------|-------|--------|--------|----------|---------|---|--------------|-----------------|---|
| Ewing        | A-673     | Ara-C & Dasatinib         | 0.25        | 24    | 48    | 1.682 | 1.682  | 1.682  | 1.682    |         | 1 | 0.002        | 0.36            | 1 |
| Ewing        | A-673     | Dasatinib & Ara-C         | 0.25        | 24    | 48    | 0.117 | 0.110  | 0.105  | 0.111    |         | 1 | 0.148        | 9.52            | 1 |
| Ewing        | A-673     | Dasatinib & Triciribine   | 1           | 24    | 48    | 0.263 | 0.257  | 0.253  | 0.258    |         | 1 | 0.313        | 4.19            | 1 |
| Ewing        | A-673     | GX15-070 & Dasatinib      | 0.02        | 24    | 48    | 1.037 | 1.026  | 1.020  | 1.028    | 0.061   | 3 | 0.110        | 2.95            | 3 |
| Ewing        | A-673     | GX15-070 & PXD-101        | 0.1         | 24    | 48    | 1.294 | 1.290  | 1.287  | 1.290    | 0.004   | 3 | 0.042        | 0.95            | 3 |
| Ewing        | A-673     | GX15-070 & Vorinostat     | 0.02        | 24    | 48    | 1.222 | 1.200  | 1.185  | 1.202    | 0.092   | 3 | 0.045        | 1.24            | 3 |
| Ewing        | A-673     | PXD-101 & Doxorubicin     | 1           | 24    | 48    | 1.938 | 1.953  | 1.964  | 1.952    | 0.083   | 2 | -0.008       | 0.50            | 2 |
| Ewing        | A-673     | PXD-101 & Etoposide       | 0.05        | 24    | 48    | 1.656 | 1.651  | 1.649  | 1.652    | 0.201   | 3 | -0.027       | 0.76            | 3 |
| Ewing        | A-673     | PXD-101 & Etoposide       | 3.33E-02    | 24    | 48    | 0.420 | 0.415  | 0.412  | 0.416    |         | 1 | 0.170        | 4.22            | 1 |
| Ewing        | A-673     | PXD-101 & Topotecan       | 0.33333     | 24    | 48    | 0.577 | 0.588  | 0.595  | 0.587    |         | 1 | 0.143        | 4.48            | 1 |
| Ewing        | A-673     | PXD-101 & Topotecan       | 2.5         | 24    | 48    | 1.145 | 1.058  | 1.003  | 1.068    |         | 1 | 0.021        | 0.10            | 1 |
| Ewing        | A-673     | Triciribine & Dasatinib   | 1           | 24    | 48    | 0.200 | 0.195  | 0.192  | 0.196    | 0.056   | 2 | 0.314        | 4.22            | 2 |
| Ewing        | RD-ES     | Ara-C & Dasatinib         | 0.25        | 24    | 48    | 0.491 | 0.475  | 0.466  | 0.478    |         | 1 | 0.232        | 4.22            | 1 |
| Ewing        | RD-ES     | GX15-070 & Dasatinib      | 0.01        | 24    | 48    | 1.655 | 1.558  | 1.496  | 1.570    |         | 1 | 0.020        | 0.32            | 1 |
| Ewing        | RD-ES     | GX15-070 & Dasatinib      | 0.02        | 24    | 48    | 0.560 | 0.494  | 0.453  | 0.502    |         | 1 | 0.255        | 3.01            | 1 |
| Ewing        | RD-ES     | GX15-070 & Doxorubicin    | 1           | 24    | 48    | 0.667 | 0.677  | 0.684  | 0.676    |         | 1 | 0.028        | 2.01            | 1 |
| Ewing        | RD-ES     | GX15-070 & Etoposide      | 0.05        | 24    | 48    | 1.470 | 1.445  | 1.429  | 1.448    |         | 1 | 0.004        | 0.37            | 1 |
| Ewing        | RD-ES     | GX15-070 & PXD-101        | 0.1         | 24    | 48    | 1.756 | 1.760  | 1.763  | 1.760    | 0.033   | 2 | -0.050       | 1.19            | 2 |
| Ewing        | RD-ES     | GX15-070 & Vorinostat     | 0.02        | 24    | 48    | 0.976 | 0.950  | 0.932  | 0.953    |         | 1 | 0.086        | 5.23            | 1 |
| Ewing        | RD-ES     | PXD-101 & Doxorubicin     | 0.33333     | 24    | 48    | 0.752 | 0.591  | 0.513  | 0.618    |         | 1 | 0.175        | 3.84            | 1 |
| Ewing        | RD-ES     | PXD-101 & Doxorubicin     | 1           | 24    | 48    | 0.932 | 0.907  | 0.890  | 0.909    | 0.098   | 2 | 0.111        | 4.37            | 2 |
| Ewing        | RD-ES     | PXD-101 & Etoposide       | 0.05        | 24    | 48    | 1.166 | 1.151  | 1.141  | 1.153    |         | 1 | 0.029        | 1.78            | 1 |
| Ewing        | RD-ES     | Selumetinib & Doxorubicin | 1           | 24    | 48    | 1.807 | 1.830  | 1.847  | 1.828    |         | 1 | 0.038        | 0.65            | 1 |
| Ewing        | SK-ES-1   | Ara-C & Dasatinib         | 0.25        | 24    | 48    | 0.881 | 0.832  | 0.800  | 0.838    |         | 1 | 0.034        | 1.69            | 1 |
| Ewing        | SK-ES-1   | Dasatinib & Ara-C         | 0.25        | 24    | 48    | 0.015 | 0.018  | 0.021  | 0.018    |         | 1 | 0.085        | 3.99            | 1 |
| Ewing        | SK-ES-1   | Dasatinib & Etoposide     | 0.4         | 48    | 24    | 0.485 | 0.675  | 0.851  | 0.670    |         | 1 |              |                 |   |
| Ewing        | SK-ES-1   | Dasatinib & Topotecan     | 0.66667     | 48    | 24    | 0.193 | 1.449  | 7.901  | 1.303    |         | 1 |              |                 |   |
| Ewing        | SK-ES-1   | Dasatinib & Topotecan     | 2.66667     | 48    | 24    | 0.343 | 1.733  | 5.525  | 1.487    |         | 1 |              |                 |   |
| Ewing        | SK-ES-1   | Dasatinib & Triciribine   | 1           | 24    | 48    | 0.390 | 0.380  | 0.373  | 0.381    | 0.011   | 2 | 0.219        | 4.74            | 2 |
| Ewing        | SK-ES-1   | GX15-070 & Dasatinib      | 0.02        | 24    | 48    | 0.913 | 0.899  | 0.891  | 0.901    | 0.079   | 3 | 0.074        | 2.58            | 3 |
| Ewing        | SK-ES-1   | GX15-070 & PXD-101        | 0.1         | 24    | 48    | 1.245 | 1.284  | 1.312  | 1.280    | 0.194   | 3 | -0.010       | 0.82            | 3 |
| Ewing        | SK-ES-1   | GX15-070 & Vorinostat     | 0.02        | 24    | 48    | 1.169 | 1.172  | 1.175  | 1.172    | 0.073   | 2 | 0.009        | 0.41            | 2 |
| Ewing        | SK-ES-1   | MK-2206 & Doxorubicin     | 20          | 24    | 48    | 0.782 | 0.925  | 1.064  | 0.924    | 0.087   | 3 | 0.082        | 2.17            | 3 |
| Ewing        | SK-ES-1   | MK-2206 & Etoposide       | 1           | 24    | 48    | 0.446 | 0.629  | 0.865  | 0.647    | 0.038   | 2 | 0.086        | 1.79            | 2 |
| Ewing        | SK-ES-1   | MK-2206 & MK-8669         | 0.2         | 24    | 48    | 0.815 | 0.947  | 1.061  | 0.941    | 0.079   | 3 | 0.171        | 3.08            | 3 |
| Ewing        | SK-ES-1   | MK-8669 & Vorinostat      | 2           | 24    | 48    | 0.205 | 1.155  | 4.072  | 0.988    |         | 1 |              |                 |   |
| Ewing        | SK-ES-1   | PXD-101 & Doxorubicin     | 1           | 24    | 48    | 0.730 | 0.716  | 0.707  | 0.718    |         | 1 | 0.129        | 2.37            | 1 |
| Ewing        | SK-ES-1   | Sorafenib & Topotecan     | 10          | 24    | 48    | 1.667 | 2.252  | 2.925  | 2.223    |         | 1 | 0.008        | 0.38            | 1 |
| Ewing        | SK-ES-1   | Topotecan & Sorafenib     | 0.002       | 24    | 48    | 7.426 | 20.198 | 41.778 | 18.231   | 17.087  | 3 | 0.036        | 2.08            | 2 |
| Ewing        | SK-ES-1   | Triciribine & Dasatinib   | 1           | 24    | 48    | 0.553 | 0.529  | 0.515  | 0.532    | 0.056   | 2 | 0.150        | 4.96            | 2 |
| Ewing        | SK-ES-1   | Vorinostat & Cisplatin    | 0.2         | 48    | 24    | 1.049 | 0.880  | 0.814  | 0.914    | 0.102   | 2 | 0.005        | 1.52            | 2 |
| Ewing        | SK-ES-1   | Vorinostat & Etoposide    | 0.2         | 48    | 24    | 0.813 | 0.941  | 1.207  | 0.987    | 0.262   | 2 | 0.075        | 1.87            | 2 |
| Ewing        | SK-ES-1   | Vorinostat & MK-8669      | 0.05        | 24    | 48    | 1.098 | 1.233  | 1.340  | 1.224    |         | 1 |              |                 |   |
| Ewing        | SK-ES-1   | Vorinostat & Topotecan    | 0.4         | 48    | 24    | 0.418 | 0.630  | 0.867  | 0.638    |         | 1 | 0.079        | 3.53            | 1 |
| osteosarcoma | MNNG HOS  | Ara-C & Dasatinib         | 0.25        | 24    | 48    | 0.274 | 0.270  | 0.267  | 0.271    |         | 1 | 0.309        | 5.05            | 1 |
| osteosarcoma | MNNG HOS  | Dasatinib & Ara-C         | 0.25        | 24    | 48    | 0.109 | 0.086  | 0.073  | 0.089    |         | 1 | 0.184        | 7.01            | 1 |
| osteosarcoma | MNNG HOS  | Dasatinib & Etoposide     | 0.4         | 48    | 24    | 0.260 | 0.354  | 0.437  | 0.350    |         | 1 |              |                 |   |
| osteosarcoma | MNNG HOS  | Dasatinib & Topotecan     | 0.66667     | 48    | 24    | 0.231 | 0.168  | 0.135  | 0.178    |         | 1 |              |                 |   |
| osteosarcoma | MNNG HOS  | Dasatinib & Topotecan     | 2.66667     | 48    | 24    | 0.281 | 0.232  | 0.204  | 0.239    |         | 1 |              |                 |   |
| osteosarcoma | MNNG HOS  | GX15-070 & Dasatinib      | 0.02        | 24    | 48    | 1.108 | 1.121  | 1.132  | 1.120    | 0.171   | 3 | 0.096        | 2.84            | 3 |
| osteosarcoma | MNNG HOS  | GX15-070 & PXD-101        | 0.1         | 24    | 48    | 1.792 | 1.887  | 1.955  | 1.878    |         | 1 | 0.024        | 0.43            | 1 |
| osteosarcoma | MNNG HOS  | GX15-070 & Vorinostat     | 0.02        | 24    | 48    | 1.438 | 1.378  | 1.340  | 1.385    | 0.276   | 3 | 0.054        | 2.72            | 3 |
| osteosarcoma | MNNG HOS  | MK-2206 & Doxorubicin     | 20          | 24    | 48    | 0.715 | 0.657  | 0.630  | 0.667    | 0.031   | 2 | 0.164        | 4.21            | 2 |
| osteosarcoma | MNNG HOS  | MK-2206 & Etoposide       | 1           | 24    | 48    | 0.707 | 0.674  | 0.659  | 0.680    | 0.078   | 3 | 0.167        | 3.92            | 3 |
| osteosarcoma | MNNG HOS  | MK-2206 & MK-8669         | 0.2         | 24    | 48    | 1.176 | 1.202  | 1.221  | 1.200    | 0.083   | 3 | 0.187        | 3.22            | 3 |
| osteosarcoma | MNNG HOS  | MK-8669 & Vorinostat      | 2           | 24    | 48    | 0.552 | 0.748  | 1.000  | 0.767    | 0.211   | 4 | 0.343        | 5.38            | 2 |
| osteosarcoma | MNNG HOS  | PXD-101 & Doxorubicin     | 0.1         | 24    | 48    | 0.754 | 0.726  | 0.709  | 0.730    |         | 1 | 0.099        | 4.18            | 1 |
| osteosarcoma | MNNG HOS  | PXD-101 & Doxorubicin     | 0.33333     | 24    | 48    | 0.952 | 0.908  | 0.880  | 0.913    |         | 1 | 0.068        | 1.32            | 1 |
| osteosarcoma | MNNG HOS  | PXD-101 & Doxorubicin     | 1           | 24    | 48    | 1.382 | 1.385  | 1.388  | 1.385    |         | 1 | 0.007        | 0.14            | 1 |
| osteosarcoma | MNNG HOS  | PXD-101 & Etoposide       | 0.05        | 24    | 48    | 1.469 | 1.591  | 1.683  | 1.578    | 0.495   | 2 | 0.028        | 1.26            | 2 |

| Sarcoma type     | Cell line | Drug combination          | Molar ratio |       |       |       |        |        |          |         | EOHSA |        | neg log p- | n |
|------------------|-----------|---------------------------|-------------|-------|-------|-------|--------|--------|----------|---------|-------|--------|------------|---|
|                  |           |                           |             | Time1 | Time2 | CI75  | CI90   | CI95   | CI(mean) | CI(SEM) | n     | (mean) | Value      |   |
| osteosarcoma     | MNNG HOS  | PXD-101 & Etoposide       | 3.33E-02    | 24    | 48    | 0.877 | 0.868  | 0.861  | 0.869    |         | 1     | 0.101  | 4.39       | 1 |
| osteosarcoma     | MNNG HOS  | PXD-101 & Topotecan       | 0.25        | 24    | 48    | 1.042 | 1.064  | 1.079  | 1.062    |         | 1     | 0.045  | 1.78       | 1 |
| osteosarcoma     | MNNG HOS  | PXD-101 & Topotecan       | 0.33333     | 24    | 48    | 0.843 | 0.850  | 0.855  | 0.849    |         | 1     | 0.061  | 2.83       | 1 |
| osteosarcoma     | MNNG HOS  | PXD-101 & Topotecan       | 2.5         | 24    | 48    | 0.718 | 0.718  | 0.718  | 0.718    |         | 1     | 0.193  | 3.57       | 1 |
| osteosarcoma     | MNNG HOS  | Sorafenib & Topotecan     | 10          | 24    | 48    | 1.412 | 1.776  | 2.188  | 1.763    | 0.460   | 2     | 0.008  | 0.38       | 1 |
| osteosarcoma     | MNNG HOS  | Topotecan & Sorafenib     | 0.002       | 24    | 48    | 2.979 | 5.022  | 7.628  | 4.755    | 3.029   | 3     | 0.002  | 2.11       | 2 |
| osteosarcoma     | MNNG HOS  | Vorinostat & Cisplatin    | 0.2         | 48    | 24    | 3.252 | 11.701 | 28.268 | 10.246   |         | 1     | 0.238  | 7.82       | 1 |
| osteosarcoma     | MNNG HOS  | Vorinostat & Etoposide    | 0.2         | 48    | 24    | 0.631 | 0.921  | 1.344  | 0.909    | 0.836   | 2     | 0.050  | 1.65       | 2 |
| osteosarcoma     | MNNG HOS  | Vorinostat & MK-8669      | 0.05        | 24    | 48    | 0.815 | 0.815  | 0.833  | 0.821    | 0.046   | 4     | 0.177  | 3.67       | 2 |
| osteosarcoma     | MNNG HOS  | Vorinostat & Topotecan    | 0.4         | 48    | 24    | 0.502 | 0.583  | 0.693  | 0.593    | 0.259   | 2     | 0.087  | 3.28       | 2 |
| osteosarcoma     | U2-OS     | Ara-C & Dasatinib         | 0.25        | 24    | 48    | 0.246 | 0.215  | 0.197  | 0.219    |         | 1     | 0.337  | 3.29       | 1 |
| osteosarcoma     | U2-OS     | GX15-070 & Dasatinib      | 0.01        | 24    | 48    | 1.168 | 1.165  | 1.163  | 1.166    |         | 1     | 0.098  | 1.82       | 1 |
| osteosarcoma     | U2-OS     | GX15-070 & Dasatinib      | 0.02        | 24    | 48    | 0.944 | 0.920  | 0.904  | 0.923    | 0.172   | 2     | 0.214  | 2.18       | 2 |
| osteosarcoma     | U2-OS     | GX15-070 & PXD-101        | 0.1         | 24    | 48    | 1.573 | 1.704  | 1.805  | 1.689    | 0.321   | 2     | 0.033  | 0.44       | 2 |
| osteosarcoma     | U2-OS     | GX15-070 & Vorinostat     | 0.01        | 24    | 48    | 2.139 | 2.371  | 2.542  | 2.345    |         | 1     | 0.012  | 0.12       | 1 |
| osteosarcoma     | U2-OS     | GX15-070 & Vorinostat     | 0.02        | 24    | 48    | 1.406 | 1.390  | 1.380  | 1.392    | 0.233   | 2     | 0.025  | 0.38       | 2 |
| osteosarcoma     | U2-OS     | MK-8669 & Vorinostat      | 2           | 24    | 48    | 0.630 | 0.826  | 1.089  | 0.848    | 0.320   | 2     | 0.169  | 4.50       | 2 |
| osteosarcoma     | U2-OS     | PXD-101 & Doxorubicin     | 0.33333     | 24    | 48    | 0.801 | 0.809  | 0.814  | 0.808    |         | 1     | 0.127  | 4.11       | 1 |
| osteosarcoma     | U2-OS     | PXD-101 & Doxorubicin     | 1           | 24    | 48    | 1.180 | 1.188  | 1.193  | 1.187    | 0.072   | 2     | 0.119  | 5.87       | 2 |
| osteosarcoma     | U2-OS     | PXD-101 & Etoposide       | 0.025       | 24    | 48    | 1.088 | 1.079  | 1.073  | 1.080    |         | 1     | 0.124  | 4.22       | 1 |
| osteosarcoma     | U2-OS     | PXD-101 & Etoposide       | 0.05        | 24    | 48    | 1.191 | 1.217  | 1.236  | 1.215    | 0.090   | 3     | 0.047  | 2.51       | 3 |
| osteosarcoma     | U2-OS     | PXD-101 & Etoposide       | 3.33E-02    | 24    | 48    | 1.069 | 1.071  | 1.073  | 1.071    |         | 1     | 0.034  | 1.53       | 1 |
| osteosarcoma     | U2-OS     | PXD-101 & Topotecan       | 0.025       | 24    | 48    | 0.394 | 0.388  | 0.384  | 0.389    |         | 1     | 0.254  | 3.18       | 1 |
| osteosarcoma     | U2-OS     | Selumetinib & Doxorubicin | 5           | 24    | 48    | 1.325 | 1.305  | 1.291  | 1.307    |         | 1     | -0.009 | 0.25       | 1 |
| osteosarcoma     | U2-OS     | Selumetinib & Topotecan   | 5           | 24    | 48    | 1.229 | 1.250  | 1.264  | 1.248    |         | 1     | -0.005 | 0.13       | 1 |
| osteosarcoma     | U2-OS     | Topotecan & Sorafenib     | 0.002       | 24    | 48    | 3.755 | 5.995  | 8.241  | 5.704    |         | 1     | 0.030  | 1.87       | 1 |
| osteosarcoma     | U2-OS     | Vorinostat & Cisplatin    | 0.2         | 48    | 24    | 0.555 | 0.462  | 0.411  | 0.476    |         | 1     | 0.100  | 4.63       | 1 |
| osteosarcoma     | U2-OS     | Vorinostat & Etoposide    | 0.2         | 48    | 24    | 0.881 | 0.799  | 0.759  | 0.813    | 0.092   | 2     | 0.065  | 3.31       | 2 |
| osteosarcoma     | U2-OS     | Vorinostat & MK-8669      | 0.05        | 24    | 48    | 0.921 | 0.788  | 0.732  | 0.814    | 0.003   | 2     | 0.105  | 3.13       | 2 |
| osteosarcoma     | U2-OS     | Vorinostat & Topotecan    | 0.4         | 48    | 24    | 0.533 | 0.419  | 0.365  | 0.439    | 0.019   | 2     | 0.104  | 2.52       | 2 |
| rhabdomyosarcoma | A-204     | Ara-C & Dasatinib         | 0.25        | 24    | 48    | 0.235 | 0.221  | 0.214  | 0.223    |         | 1     | 0.393  | 4.93       | 1 |
| rhabdomyosarcoma | A-204     | GX15-070 & Dasatinib      | 0.01        | 24    | 48    | 0.550 | 0.506  | 0.478  | 0.511    |         | 1     | 0.142  | 2.98       | 1 |
| rhabdomyosarcoma | A-204     | GX15-070 & Dasatinib      | 0.02        | 24    | 48    | 0.392 | 0.386  | 0.381  | 0.386    | 0.023   | 3     | 0.291  | 5.95       | 3 |
| rhabdomyosarcoma | A-204     | GX15-070 & PXD-101        | 0.1         | 24    | 48    | 0.947 | 0.983  | 1.015  | 0.982    | 0.237   | 4     | 0.121  | 2.24       | 4 |
| rhabdomyosarcoma | A-204     | GX15-070 & Vorinostat     | 0.01        | 24    | 48    | 0.929 | 0.900  | 0.881  | 0.903    |         | 1     | 0.047  | 2.07       | 1 |
| rhabdomyosarcoma | A-204     | GX15-070 & Vorinostat     | 0.02        | 24    | 48    | 0.845 | 0.816  | 0.797  | 0.819    | 0.162   | 3     | 0.136  | 3.29       | 3 |
| rhabdomyosarcoma | A-204     | MK-8669 & Vorinostat      | 2           | 24    | 48    | 0.554 | 0.923  | 1.449  | 0.887    | 0.335   | 2     | 0.200  | 4.39       | 2 |
| rhabdomyosarcoma | A-204     | PXD-101 & Doxorubicin     | 0.33333     | 24    | 48    | 1.054 | 1.089  | 1.114  | 1.086    |         | 1     | 0.122  | 2.83       | 1 |
| rhabdomyosarcoma | A-204     | PXD-101 & Doxorubicin     | 1           | 24    | 48    | 1.447 | 1.372  | 1.323  | 1.381    |         | 1     | 0.080  | 4.93       | 1 |
| rhabdomyosarcoma | A-204     | PXD-101 & Etoposide       | 0.025       | 24    | 48    | 1.016 | 1.000  | 0.989  | 1.002    |         | 1     | 0.052  | 0.94       | 1 |
| rhabdomyosarcoma | A-204     | PXD-101 & Etoposide       | 0.05        | 24    | 48    | 1.033 | 1.013  | 1.000  | 1.016    | 0.127   | 2     | 0.073  | 4.29       | 2 |
| rhabdomyosarcoma | A-204     | PXD-101 & Etoposide       | 3.33E-02    | 24    | 48    | 1.084 | 1.064  | 1.051  | 1.067    |         | 1     | 0.010  | 0.28       | 1 |
| rhabdomyosarcoma | A-204     | PXD-101 & Topotecan       | 0.33333     | 24    | 48    | 0.874 | 0.849  | 0.835  | 0.853    |         | 1     | 0.049  | 1.37       | 1 |
| rhabdomyosarcoma | A-204     | PXD-101 & Topotecan       | 2.5         | 24    | 48    | 1.005 | 0.971  | 0.949  | 0.975    |         | 1     | 0.077  | 4.53       | 1 |
| rhabdomyosarcoma | A-204     | Selumetinib & Doxorubicin | 1           | 24    | 48    | 1.287 | 1.215  | 1.169  | 1.224    |         | 1     | 0.178  | 3.65       | 1 |
| rhabdomyosarcoma | A-204     | Sorafenib & Topotecan     | 10          | 24    | 48    | 0.312 | 0.384  | 0.445  | 0.380    |         | 1     | 0.183  | 5.46       | 1 |
| rhabdomyosarcoma | A-204     | Topotecan & Sorafenib     | 0.002       | 24    | 48    | 0.498 | 0.541  | 0.573  | 0.537    |         | 1     | 0.296  | 3.72       | 1 |
| rhabdomyosarcoma | A-204     | Vorinostat & Cisplatin    | 0.2         | 48    | 24    | 0.811 | 0.961  | 1.214  | 0.962    | 0.717   | 2     | 0.044  | 2.45       | 2 |
| rhabdomyosarcoma | A-204     | Vorinostat & Etoposide    | 0.2         | 48    | 24    | 0.760 | 0.854  | 1.060  | 0.870    | 0.645   | 2     | 0.021  | 0.39       | 2 |
| rhabdomyosarcoma | A-204     | Vorinostat & MK-8669      | 0.05        | 24    | 48    | 0.750 | 0.680  | 0.648  | 0.693    | 0.058   | 2     | 0.129  | 3.34       | 2 |
| rhabdomyosarcoma | A-204     | Vorinostat & Topotecan    | 0.4         | 48    | 24    | 0.904 | 1.789  | 3.681  | 1.813    |         | 1     | 0.039  | 1.40       | 1 |
| leiomyosarcoma   | SK-LMS-1  | Ara-C & Dasatinib         | 0.25        | 24    | 48    | 0.408 | 0.415  | 0.419  | 0.414    |         | 1     | 0.285  | 4.66       | 1 |
| leiomyosarcoma   | SK-LMS-1  | GX15-070 & Dasatinib      | 0.01        | 24    | 48    | 0.921 | 0.894  | 0.876  | 0.897    |         | 1     | 0.115  | 1.61       | 1 |
| leiomyosarcoma   | SK-LMS-1  | GX15-070 & Dasatinib      | 0.02        | 24    | 48    | 0.521 | 0.517  | 0.515  | 0.518    | 0.203   | 3     | 0.273  | 3.93       | 3 |
| leiomyosarcoma   | SK-LMS-1  | GX15-070 & PXD-101        | 0.1         | 24    | 48    | 0.963 | 0.968  | 0.972  | 0.968    |         | 1     | 0.039  | 0.59       | 1 |
| leiomyosarcoma   | SK-LMS-1  | GX15-070 & Topotecan      | 0.5         | 24    | 48    | 2.273 | 2.245  | 2.226  | 2.248    |         | 1     | -0.032 | 0.75       | 1 |
| leiomyosarcoma   | SK-LMS-1  | GX15-070 & Vorinostat     | 0.01        | 24    | 48    | 1.117 | 1.121  | 1.124  | 1.120    |         | 1     | 0.085  | 1.13       | 1 |
| leiomyosarcoma   | SK-LMS-1  | GX15-070 & Vorinostat     | 0.02        | 24    | 48    | 1.186 | 1.216  | 1.237  | 1.213    |         | 1     | 0.057  | 1.01       | 1 |
| leiomyosarcoma   | SK-LMS-1  | MK-8669 & Vorinostat      | 2           | 24    | 48    | 0.507 | 0.766  | 1.067  | 0.780    |         | 1     | 0.106  | 1.71       | 1 |
| leiomyosarcoma   | SK-LMS-1  | PXD-101 & Doxorubicin     | 0.33333     | 24    | 48    | 2.230 | 2.285  | 2.323  | 2.279    |         | 1     | -0.016 | 0.22       | 1 |
| leiomyosarcoma   | SK-LMS-1  | PXD-101 & Doxorubicin     | 1           | 24    | 48    | 0.891 | 0.817  | 0.770  | 0.826    |         | 1     | 0.070  | 1.76       | 1 |
| leiomyosarcoma   | SK-LMS-1  | PXD-101 & Etoposide       | 0.05        | 24    | 48    | 1.437 | 1.492  | 1.534  | 1.486    | 0.569   | 2     | 0.037  | 1.30       | 2 |
| leiomyosarcoma   | SK-LMS-1  | PXD-101 & Etoposide       | 3.33E-02    | 24    | 48    | 1.785 | 1.804  | 1.818  | 1.802    |         | 1     | -0.033 | 0.49       | 1 |
| leiomyosarcoma   | SK-LMS-1  | PXD-101 & Topotecan       | 2.5         | 24    | 48    | 0.944 | 1.041  | 1.113  | 1.033    |         | 1     | 0.047  | 2.48       | 1 |
| leiomyosarcoma   | SK-LMS-1  | Selumetinib & Doxorubicin | 1           | 24    | 48    | 1.049 | 1.036  | 1.028  | 1.038    | 0.050   | 2     | 0.107  | 2.53       | 2 |
| leiomyosarcoma   | SK-LMS-1  | Selumetinib & Doxorubicin | 5           | 24    | 48    | 1.072 | 1.104  | 1.126  | 1.101    |         | 1     | 0.015  | 0.88       | 1 |
| leiomyosarcoma   | SK-LMS-1  | Selumetinib & Saracatinib | 5           | 24    | 48    | 0.610 | 0.617  | 0.621  | 0.616    |         | 1     | 0.059  | 0.89       | 1 |

| Sarcoma type   | Cell line | Drug combination        | Molar ratio |       |       |        |        |         |          |         | EOHSA |        | neg log p-Value | n |
|----------------|-----------|-------------------------|-------------|-------|-------|--------|--------|---------|----------|---------|-------|--------|-----------------|---|
|                |           |                         |             | Time1 | Time2 | CI75   | CI90   | CI95    | CI(mean) | CI(SEM) | n     | (mean) |                 |   |
| leiomyosarcoma | SK-LMS-1  | Selumetinib & Topotecan | 1           | 24    | 48    | 1.206  | 1.192  | 1.183   | 1.194    | 0.000   | 2     | 0.054  | 0.52            | 2 |
| leiomyosarcoma | SK-LMS-1  | Topotecan & Sorafenib   | 0.002       | 24    | 48    | 19.864 | 57.041 | 117.565 | 50.946   | 50.138  | 2     | 0.014  | 0.66            | 2 |
| leiomyosarcoma | SK-LMS-1  | Vorinostat & Cisplatin  | 0.2         | 48    | 24    | 0.909  | 0.766  | 0.694   | 0.790    |         | 1     | 0.013  | 0.33            | 1 |
| leiomyosarcoma | SK-LMS-1  | Vorinostat & Etoposide  | 0.2         | 48    | 24    | 3.017  | 11.894 | 30.281  | 10.280   |         | 1     | 0.247  | 4.66            | 1 |
| leiomyosarcoma | SK-LMS-1  | Vorinostat & MK-8669    | 0.05        | 24    | 48    | 0.920  | 0.832  | 0.784   | 0.845    | 0.071   | 2     | 0.078  | 1.51            | 2 |
| leiomyosarcoma | SK-LMS-1  | Vorinostat & Topotecan  | 0.4         | 48    | 24    | 0.391  | 0.301  | 0.285   | 0.326    |         | 1     | -0.120 | 1.24            | 1 |
| leiomyosarcoma | SK-UT-1   | Ara-C & Dasatinib       | 0.25        | 24    | 48    | 0.639  | 0.634  | 0.631   | 0.634    |         | 1     | 0.114  | 2.75            | 1 |
| leiomyosarcoma | SK-UT-1   | Dasatinib & Ara-C       | 0.25        | 24    | 48    | 0.048  | 0.046  | 0.044   | 0.046    |         | 1     | 0.287  | 10.29           | 1 |
| leiomyosarcoma | SK-UT-1   | Dasatinib & Etoposide   | 0.2         | 48    | 24    | 0.376  | 0.281  | 0.234   | 0.297    |         | 1     |        |                 |   |
| leiomyosarcoma | SK-UT-1   | Dasatinib & Etoposide   | 0.4         | 48    | 24    | 0.181  | 0.208  | 0.234   | 0.208    |         | 1     |        |                 |   |
| leiomyosarcoma | SK-UT-1   | Dasatinib & Topotecan   | 0.66667     | 48    | 24    | 0.400  | 0.319  | 0.276   | 0.332    | 0.201   | 2     |        |                 |   |
| leiomyosarcoma | SK-UT-1   | Dasatinib & Topotecan   | 2.66667     | 48    | 24    | 0.575  | 0.536  | 0.521   | 0.544    | 0.387   | 2     |        |                 |   |
| leiomyosarcoma | SK-UT-1   | GX15-070 & Dasatinib    | 0.02        | 24    | 48    | 0.891  | 0.884  | 0.880   | 0.885    | 0.070   | 3     | 0.122  | 3.27            | 3 |
| leiomyosarcoma | SK-UT-1   | GX15-070 & PXD-101      | 0.1         | 24    | 48    | 1.220  | 1.215  | 1.211   | 1.215    | 0.162   | 3     | 0.092  | 1.28            | 3 |
| leiomyosarcoma | SK-UT-1   | GX15-070 & Vorinostat   | 0.02        | 24    | 48    | 1.227  | 1.208  | 1.196   | 1.210    | 0.182   | 3     | 0.066  | 1.14            | 3 |
| leiomyosarcoma | SK-UT-1   | MK-2206 & Doxorubicin   | 20          | 24    | 48    | 0.727  | 0.692  | 0.684   | 0.701    | 0.095   | 3     | 0.150  | 4.08            | 3 |
| leiomyosarcoma | SK-UT-1   | MK-2206 & Etoposide     | 1           | 24    | 48    | 0.710  | 0.771  | 0.832   | 0.771    | 0.051   | 3     | 0.153  | 3.87            | 3 |
| leiomyosarcoma | SK-UT-1   | MK-2206 & MK-8669       | 0.2         | 24    | 48    | 0.877  | 0.899  | 0.918   | 0.898    | 0.074   | 3     | 0.177  | 3.65            | 3 |
| leiomyosarcoma | SK-UT-1   | MK-8669 & Vorinostat    | 2           | 24    | 48    | 0.772  | 1.366  | 2.490   | 1.286    | 0.343   | 3     | 0.122  | 3.44            | 1 |
| leiomyosarcoma | SK-UT-1   | PXD-101 & Doxorubicin   | 0.33333     | 24    | 48    | 0.703  | 0.704  | 0.706   | 0.704    |         | 1     | 0.189  | 4.73            | 1 |
| leiomyosarcoma | SK-UT-1   | PXD-101 & Doxorubicin   | 1           | 24    | 48    | 0.493  | 0.492  | 0.491   | 0.492    |         | 1     | 0.264  | 5.23            | 1 |
| leiomyosarcoma | SK-UT-1   | PXD-101 & Etoposide     | 0.05        | 24    | 48    | 0.614  | 0.603  | 0.596   | 0.604    | 0.132   | 3     | 0.186  | 7.22            | 3 |
| leiomyosarcoma | SK-UT-1   | PXD-101 & Etoposide     | 3.33E-02    | 24    | 48    | 0.767  | 0.776  | 0.782   | 0.775    |         | 1     | 0.166  | 3.88            | 1 |
| leiomyosarcoma | SK-UT-1   | PXD-101 & Topotecan     | 0.33333     | 24    | 48    | 0.627  | 0.623  | 0.621   | 0.623    |         | 1     | 0.171  | 6.32            | 1 |
| leiomyosarcoma | SK-UT-1   | PXD-101 & Topotecan     | 2.5         | 24    | 48    | 0.459  | 0.448  | 0.441   | 0.449    |         | 1     | 0.177  | 5.17            | 1 |
| leiomyosarcoma | SK-UT-1   | Sorafenib & Topotecan   | 10          | 24    | 48    | 2.881  | 6.582  | 13.995  | 6.426    |         | 1     | -0.063 | 3.73            | 1 |
| leiomyosarcoma | SK-UT-1   | Topotecan & Sorafenib   | 0.002       | 24    | 48    | 1.556  | 1.673  | 1.795   | 1.666    | 0.446   | 3     | 0.000  | 0.84            | 2 |
| leiomyosarcoma | SK-UT-1   | Vorinostat & Cisplatin  | 0.2         | 48    | 24    | 0.578  | 0.374  | 0.278   | 0.410    | 0.104   | 2     | -0.004 | 0.94            | 2 |
| leiomyosarcoma | SK-UT-1   | Vorinostat & Etoposide  | 0.2         | 48    | 24    | 0.374  | 0.233  | 0.171   | 0.259    | 0.004   | 2     | 0.080  | 2.52            | 2 |
| leiomyosarcoma | SK-UT-1   | Vorinostat & MK-8669    | 0.05        | 24    | 48    | 0.851  | 0.863  | 0.887   | 0.867    | 0.033   | 4     | 0.117  | 2.86            | 2 |
| leiomyosarcoma | SK-UT-1   | Vorinostat & Topotecan  | 0.4         | 48    | 24    | 0.357  | 0.258  | 0.221   | 0.279    | 0.002   | 2     | 0.089  | 3.92            | 2 |
| liposarcoma    | SW-872    | Ara-C & Dasatinib       | 0.25        | 24    | 48    | 0.264  | 0.282  | 0.294   | 0.280    |         | 1     | 0.194  | 2.95            | 1 |
| liposarcoma    | SW-872    | Dasatinib & Ara-C       | 0.25        | 24    | 48    | 0.027  | 0.027  | 0.026   | 0.027    |         | 1     | 0.353  | 5.53            | 1 |
| liposarcoma    | SW-872    | Dasatinib & Etoposide   | 0.4         | 48    | 14    | 0.254  | 0.229  | 0.213   | 0.232    |         | 1     |        |                 |   |
| liposarcoma    | SW-872    | Dasatinib & Topotecan   | 0.66667     | 48    | 14    | 0.129  | 0.129  | 0.129   | 0.129    |         | 1     |        |                 |   |
| liposarcoma    | SW-872    | Dasatinib & Topotecan   | 2.66667     | 48    | 14    | 0.229  | 0.141  | 0.102   | 0.158    |         | 1     |        |                 |   |
| liposarcoma    | SW-872    | Dasatinib & Triciribine | 1           | 24    | 48    | 0.538  | 0.536  | 0.535   | 0.536    |         | 1     | 0.180  | 7.76            | 1 |
| liposarcoma    | SW-872    | GX15-070 & Dasatinib    | 0.01        | 24    | 48    | 1.244  | 1.231  | 1.222   | 1.232    |         | 1     | 0.093  | 1.71            | 1 |
| liposarcoma    | SW-872    | GX15-070 & Dasatinib    | 0.02        | 24    | 48    | 1.115  | 1.104  | 1.097   | 1.106    | 0.004   | 2     | 0.101  | 2.29            | 2 |
| liposarcoma    | SW-872    | GX15-070 & PXD-101      | 0.1         | 24    | 48    | 1.412  | 1.448  | 1.474   | 1.445    | 0.167   | 3     | 0.029  | 0.61            | 3 |
| liposarcoma    | SW-872    | GX15-070 & Vorinostat   | 0.02        | 24    | 48    | 1.490  | 1.473  | 1.462   | 1.475    |         | 1     | 0.007  | 0.18            | 1 |
| liposarcoma    | SW-872    | GX15-070 & Vorinostat   | 100         | 24    | 48    | 0.413  | 0.413  | 0.414   | 0.413    |         | 1     | 0.257  | 3.76            | 1 |
| liposarcoma    | SW-872    | MK-2206 & Doxorubicin   | 20          | 24    | 48    | 0.807  | 0.728  | 0.688   | 0.741    | 0.134   | 3     | 0.136  | 3.01            | 3 |
| liposarcoma    | SW-872    | MK-2206 & Etoposide     | 1           | 24    | 48    | 1.041  | 1.017  | 1.004   | 1.021    | 0.047   | 3     | 0.158  | 3.40            | 3 |
| liposarcoma    | SW-872    | MK-2206 & MK-8669       | 0.2         | 24    | 48    | 1.128  | 1.209  | 1.278   | 1.205    | 0.073   | 3     | 0.188  | 3.47            | 3 |
| liposarcoma    | SW-872    | MK-8669 & Vorinostat    | 2           | 24    | 48    | 1.817  | 3.830  | 6.411   | 3.547    |         | 1     |        |                 |   |
| liposarcoma    | SW-872    | PXD-101 & Doxorubicin   | 0.33333     | 24    | 48    | 0.668  | 0.661  | 0.656   | 0.662    |         | 1     | 0.142  | 2.49            | 1 |
| liposarcoma    | SW-872    | PXD-101 & Doxorubicin   | 1           | 24    | 48    | 1.165  | 1.164  | 1.164   | 1.164    |         | 1     | 0.068  | 4.75            | 1 |
| liposarcoma    | SW-872    | PXD-101 & Etoposide     | 0.05        | 24    | 48    | 1.179  | 1.178  | 1.178   | 1.179    | 0.084   | 2     | 0.066  | 2.77            | 2 |
| liposarcoma    | SW-872    | PXD-101 & Etoposide     | 3.33E-02    | 24    | 48    | 0.669  | 0.655  | 0.645   | 0.656    |         | 1     | 0.068  | 1.58            | 1 |
| liposarcoma    | SW-872    | PXD-101 & Topotecan     | 0.33333     | 24    | 48    | 0.796  | 0.812  | 0.823   | 0.810    |         | 1     | 0.032  | 1.97            | 1 |
| liposarcoma    | SW-872    | PXD-101 & Topotecan     | 2.5         | 24    | 48    | 1.037  | 1.041  | 1.044   | 1.041    | 0.057   | 2     | 0.018  | 1.13            | 2 |
| liposarcoma    | SW-872    | Sorafenib & Topotecan   | 10          | 24    | 48    | 1.288  | 1.564  | 1.786   | 1.546    | 0.093   | 2     | -0.027 | 1.40            | 1 |
| liposarcoma    | SW-872    | Topotecan & Sorafenib   | 0.002       | 24    | 48    | 0.914  | 0.895  | 0.895   | 0.901    | 0.328   | 2     | 0.108  | 2.25            | 1 |
| liposarcoma    | SW-872    | Triciribine & Dasatinib | 1           | 24    | 48    | 0.203  | 0.198  | 0.195   | 0.198    |         | 1     | 0.302  | 10.62           | 1 |
| liposarcoma    | SW-872    | Vorinostat & Cisplatin  | 0.2         | 48    | 24    | 0.663  | 0.605  | 0.569   | 0.613    |         | 1     | 0.088  | 3.43            | 1 |
| liposarcoma    | SW-872    | Vorinostat & Etoposide  | 0.2         | 48    | 24    | 0.989  | 1.273  | 1.572   | 1.237    | 0.343   | 2     | 0.067  | 2.41            | 2 |
| liposarcoma    | SW-872    | Vorinostat & MK-8669    | 0.05        | 24    | 48    | 1.051  | 0.953  | 0.895   | 0.966    | 0.139   | 3     | 0.057  | 2.21            | 2 |
| fibrosarcoma   | HT-1080   | Ara-C & Dasatinib       | 0.25        | 24    | 48    | 0.482  | 0.402  | 0.356   | 0.414    |         | 1     | 0.251  | 5.62            | 1 |
| fibrosarcoma   | HT-1080   | GX15-070 & Dasatinib    | 0.01        | 24    | 48    | 0.888  | 0.877  | 0.869   | 0.878    |         | 1     | 0.179  | 3.49            | 1 |
| fibrosarcoma   | HT-1080   | GX15-070 & Dasatinib    | 0.02        | 24    | 48    | 0.652  | 0.638  | 0.630   | 0.640    | 0.109   | 3     | 0.244  | 3.86            | 3 |
| fibrosarcoma   | HT-1080   | GX15-070 & Doxorubicin  | 1           | 24    | 48    | 0.775  | 0.778  | 0.780   | 0.777    |         | 1     | 0.109  | 3.64            | 1 |
| fibrosarcoma   | HT-1080   | GX15-070 & PXD-101      | 0.1         | 24    | 48    | 0.972  | 0.990  | 1.002   | 0.988    | 0.180   | 3     | 0.132  | 1.61            | 3 |
| fibrosarcoma   | HT-1080   | GX15-070 & Vorinostat   | 0.01        | 24    | 48    | 1.002  | 0.948  | 0.913   | 0.954    |         | 1     | 0.157  | 2.38            | 1 |
| fibrosarcoma   | HT-1080   | GX15-070 & Vorinostat   | 0.02        | 24    | 48    | 0.858  | 0.869  | 0.877   | 0.868    | 0.138   | 3     | 0.135  | 1.62            | 3 |
| fibrosarcoma   | HT-1080   | MK-8669 & Vorinostat    | 2           | 24    | 48    | 0.450  | 0.602  | 0.760   | 0.604    | 0.073   | 2     | 0.308  | 3.78            | 2 |
| fibrosarcoma   | HT-1080   | PXD-101 & Doxorubicin   | 0.025       | 24    | 48    | 0.300  | 0.283  | 0.273   | 0.285    |         | 1     | 0.275  | 3.50            | 1 |

| Sarcoma type | Cell line | Drug combination          | Molar    |       |       |       |       |       |          |         | EOHSA |        | neg log p- | n |
|--------------|-----------|---------------------------|----------|-------|-------|-------|-------|-------|----------|---------|-------|--------|------------|---|
|              |           |                           | ratio    | Time1 | Time2 | CI75  | CI90  | CI95  | CI(mean) | CI(SEM) | n     | (mean) | Value      |   |
| fibrosarcoma | HT-1080   | PXD-101 & Doxorubicin     | 1        | 24    | 48    | 0.676 | 0.678 | 0.679 | 0.677    | 0.021   | 1     | 0.266  | 5.02       | 1 |
| fibrosarcoma | HT-1080   | PXD-101 & Etoposide       | 0.025    | 24    | 48    | 0.753 | 0.754 | 0.755 | 0.754    |         | 1     | 0.153  | 3.39       | 1 |
| fibrosarcoma | HT-1080   | PXD-101 & Etoposide       | 0.05     | 24    | 48    | 0.688 | 0.691 | 0.692 | 0.690    |         | 2     | 0.182  | 4.34       | 2 |
| fibrosarcoma | HT-1080   | PXD-101 & Etoposide       | 3.33E-02 | 24    | 48    | 0.735 | 0.736 | 0.737 | 0.736    | 1       | 1     | 0.137  | 3.43       | 1 |
| fibrosarcoma | HT-1080   | PXD-101 & Topotecan       | 0.025    | 24    | 48    | 0.994 | 1.004 | 1.011 | 1.003    | 1       | 1     | 0.024  | 1.15       | 1 |
| fibrosarcoma | HT-1080   | PXD-101 & Topotecan       | 0.25     | 24    | 48    | 0.516 | 0.531 | 0.542 | 0.530    | 1       | 1     | 0.225  | 4.95       | 1 |
| fibrosarcoma | HT-1080   | PXD-101 & Topotecan       | 0.33333  | 24    | 48    | 0.609 | 0.610 | 0.610 | 0.610    | 1       | 1     | 0.138  | 2.83       | 1 |
| fibrosarcoma | HT-1080   | PXD-101 & Topotecan       | 2.5      | 24    | 48    | 0.609 | 0.609 | 0.609 | 0.609    | 1       | 1     | 0.156  | 3.59       | 1 |
| fibrosarcoma | HT-1080   | Selumetinib & Doxorubicin | 1        | 24    | 48    | 0.899 | 0.924 | 0.942 | 0.922    | 0.079   | 2     | 0.127  | 3.01       | 2 |
| fibrosarcoma | HT-1080   | Selumetinib & Topotecan   | 1        | 24    | 48    | 1.105 | 1.211 | 1.289 | 1.202    |         | 1     | 0.044  | 0.29       | 1 |
| fibrosarcoma | HT-1080   | Topotecan & Sorafenib     | 0.002    | 24    | 48    | 0.997 | 0.862 | 0.782 | 0.880    | 1       | 1     | 0.037  | 0.76       | 1 |
| fibrosarcoma | HT-1080   | Vorinostat & Cisplatin    | 0.2      | 48    | 24    | 0.447 | 0.370 | 0.327 | 0.381    | 1       | 1     | 0.112  | 2.19       | 1 |
| fibrosarcoma | HT-1080   | Vorinostat & Etoposide    | 0.2      | 48    | 24    | 0.528 | 0.429 | 0.381 | 0.446    | 0.019   | 3     | 0.095  | 2.12       | 3 |
| fibrosarcoma | HT-1080   | Vorinostat & MK-8669      | 0.05     | 24    | 48    | 0.662 | 0.604 | 0.571 | 0.612    |         | 2     | 0.172  | 2.40       | 2 |
| fibrosarcoma | HT-1080   | Vorinostat & Topotecan    | 0.4      | 48    | 24    | 0.643 | 0.607 | 0.593 | 0.614    | 0.162   | 2     | 0.101  | 4.25       | 2 |



Supplemental Figure 1S.

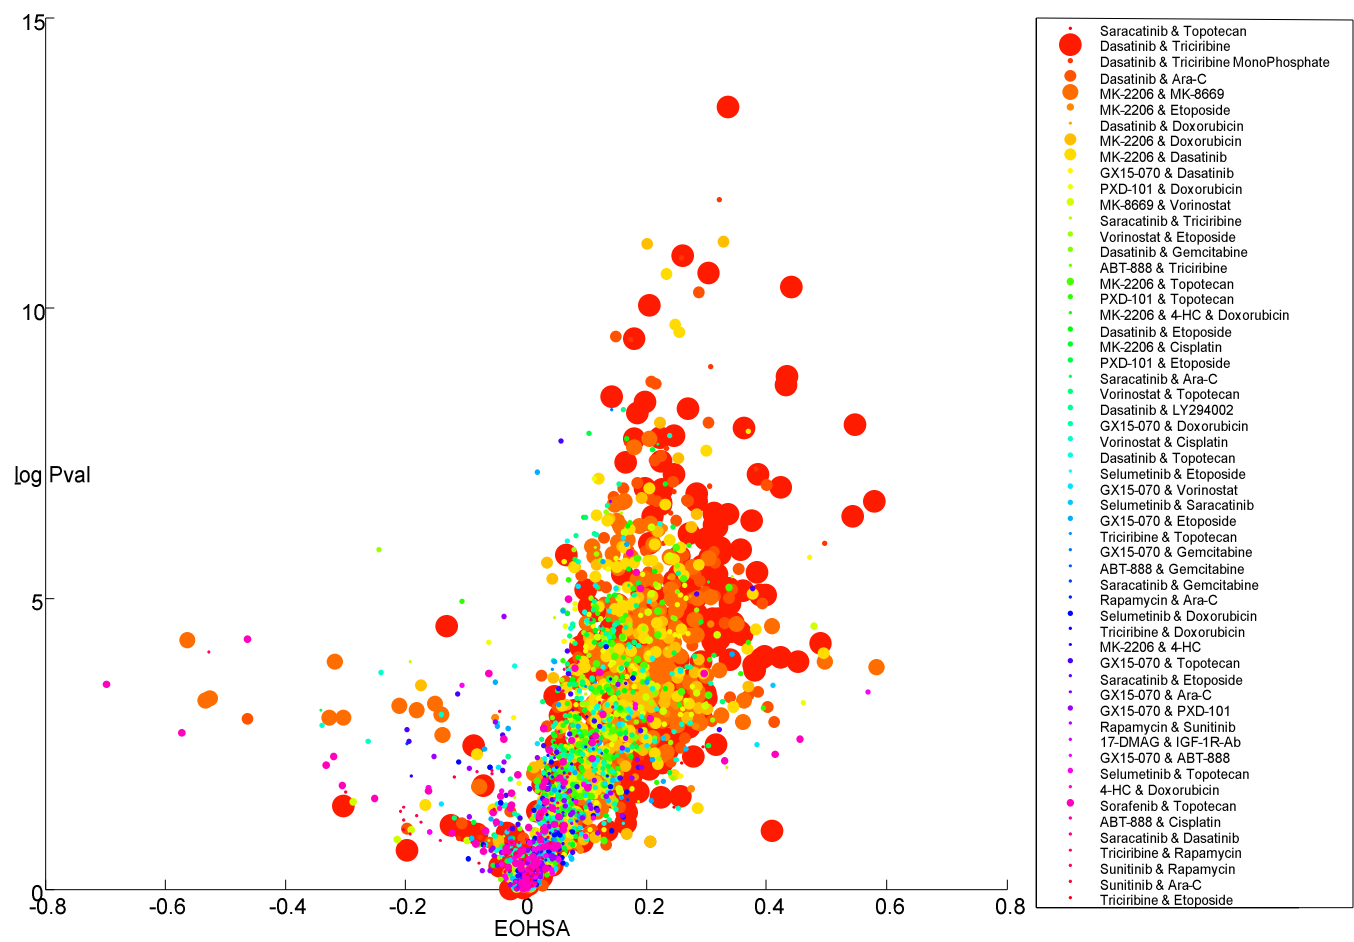

Supplement: f1 [file 365723.f1.pdf]
